# Supplementary material for: On the Computational Design of Azobenzene-Based Multi-State Photoswitches
Source: MDPI journal article supplement (doi:10.3390/ijms23158690), 2022-08-04
Supplement: s1 [file s1]

# On the computational design of azobenzene based multi-state photoswitches

Miquel Moreno <sup>1,\*</sup>, José M. Lluch <sup>1,2</sup> and Ricard Gelabert <sup>1</sup>

<sup>1</sup> Departament de Química, Universitat Autònoma de Barcelona, 08193 Bellaterra, Barcelona, Spain

<sup>2</sup> Institut de Biotecnologia i de Biomedicina (IBB), Universitat Autònoma de Barcelona, 08193 Bellaterra, Barcelona, Spain

\* Correspondence: miquel.moreno@uab.cat; Tel.: +34935812174

## SUPPLEMENTARY INFORMATION

|                                                                  |    |
|------------------------------------------------------------------|----|
| Additional computational details .....                           | 2  |
| Shape of Molecular orbitals of dimer 1 .....                     | 3  |
| Geometries of the conical intersections of dimer 1 .....         | 6  |
| Shape of Molecular orbitals of dimer 2 .....                     | 7  |
| Geometries of the conical intersections of dimer 2 .....         | 10 |
| Thermodynamics of the ground state for dimer 1 and 2 .....       | 11 |
| Results of dimer 1 using two different basis sets .....          | 12 |
| Cartesian coordinates of the stationary points for dimer 1 ..... | 13 |
| Cartesian coordinates of the stationary points for dimer 2 ..... | 29 |

## **Additional Computational details**

The SCF convergence criteria for the calculations was established at  $10^{-8}$  a.u. of energy. For the optimizations the convergence was granted when the larger gradient component was below  $4.5 \cdot 10^{-3}$  a.u. and the RMS value was lower than  $3.0 \cdot 10^{-3}$  a.u. For the DFT calculations a pruned grid with 99 radial shells and 510 angular points per shell was adopted. The linear TDDFT calculations were carried out without the Tamm-Dancoff approximation. The lowest 15 excited states were converged for each TDDFT run.

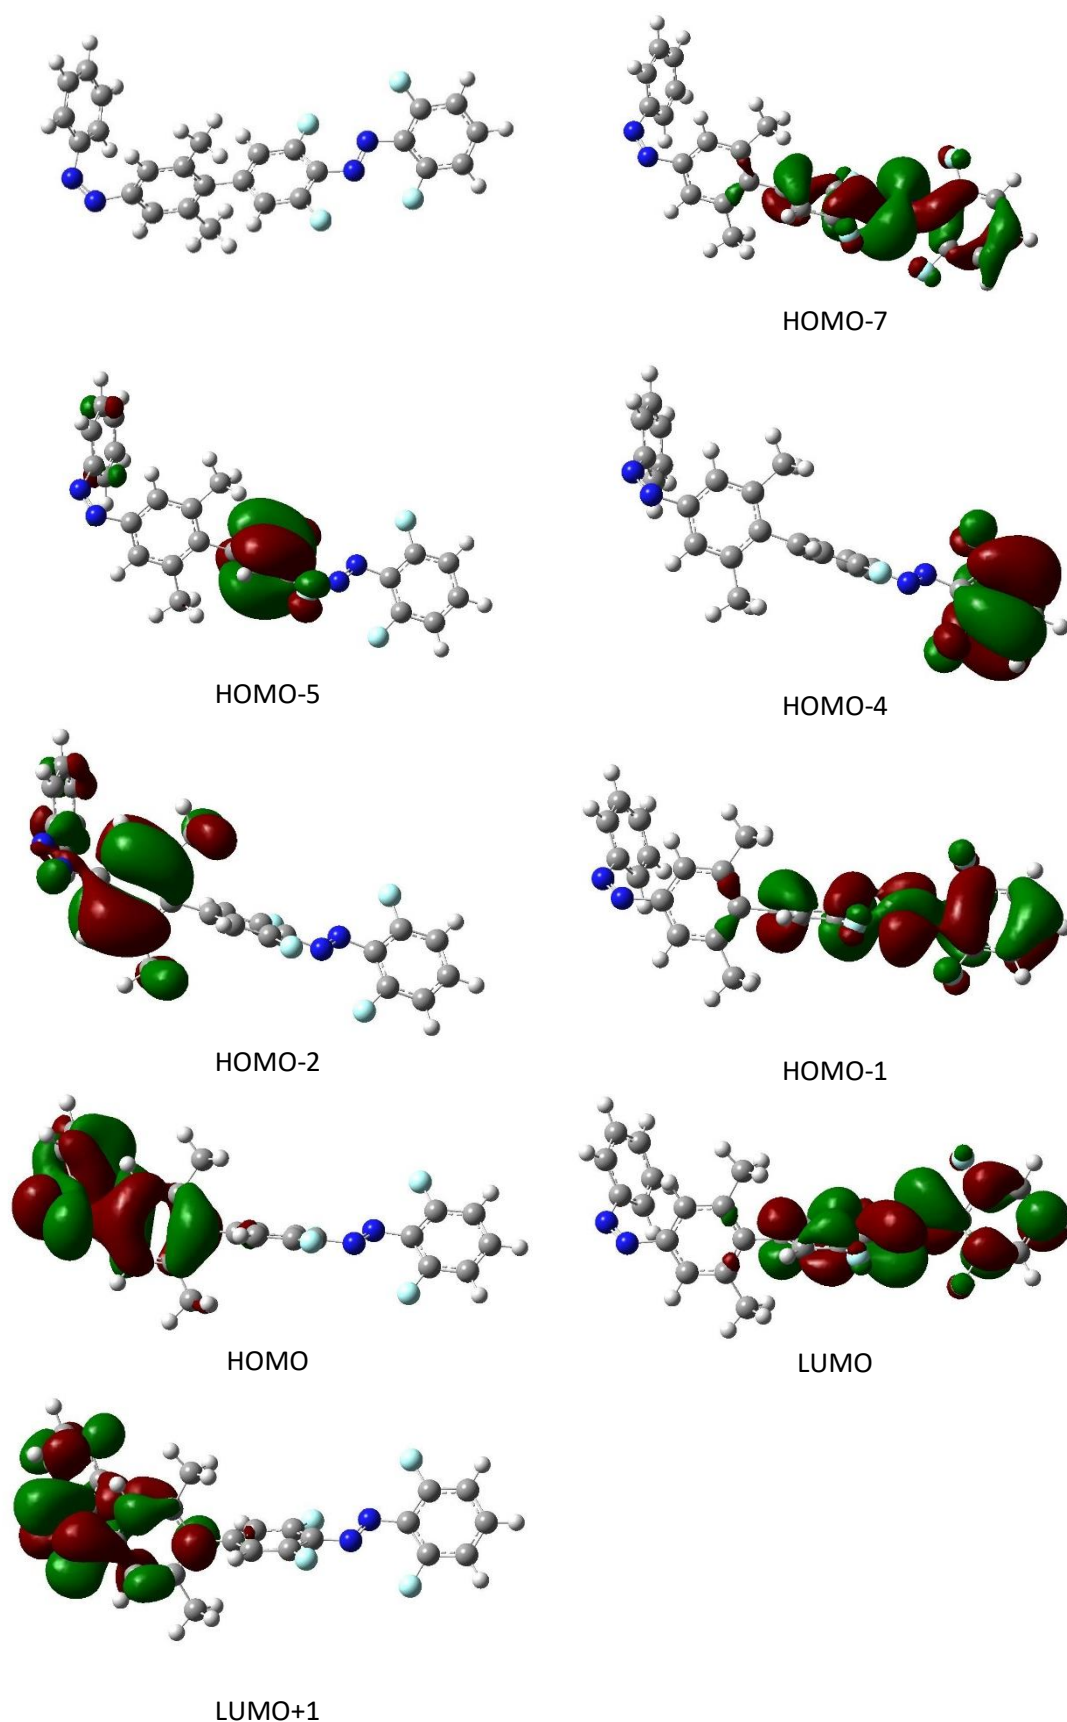

**FIGURE S1:** Shape of the molecular orbitals involved in the relevant excited electronic states of the  $\text{ZEF}$  isomer of dimer 1. The draws correspond to an iso-level of 0.02 a.u. of electronic density. The left top corner of the Figure depicts the molecular structure of the  $\text{ZEF}$  isomer.

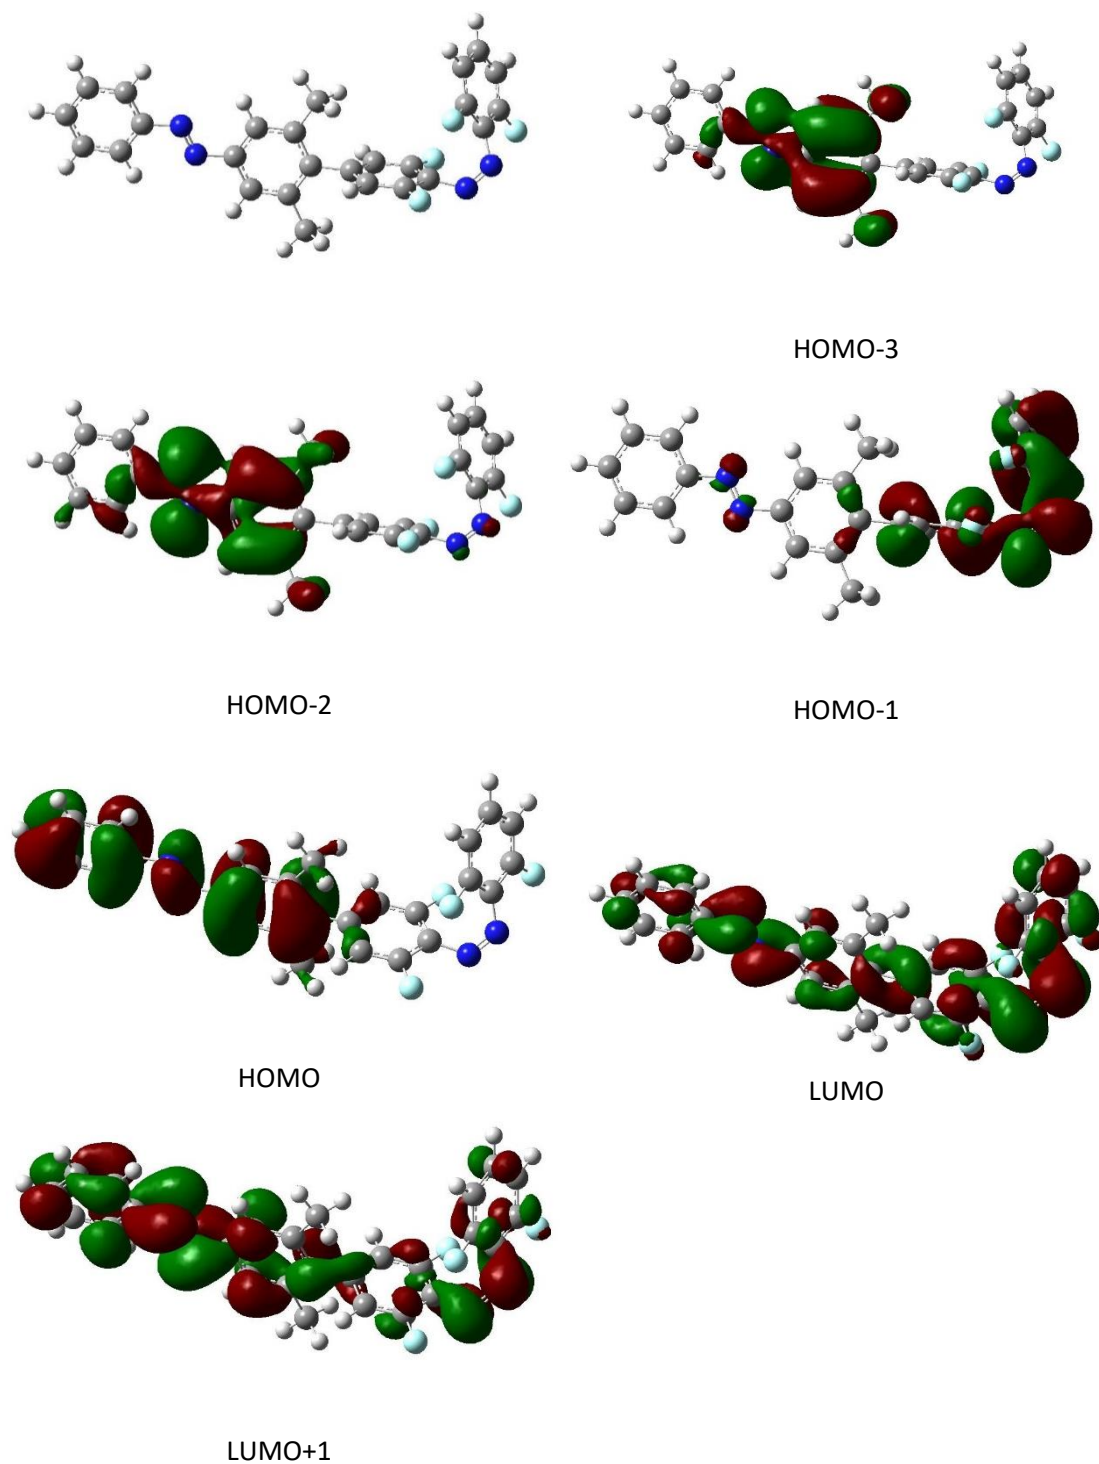

**FIGURE S2:** Shape of the molecular orbitals involved in the relevant excited electronic states of the  $EZ_F$  isomer of dimer 1. The draws correspond to an iso-level of 0.02 a.u. of electronic density. The left top corner of the Figure depicts the molecular structure of the  $EZ_F$  isomer.

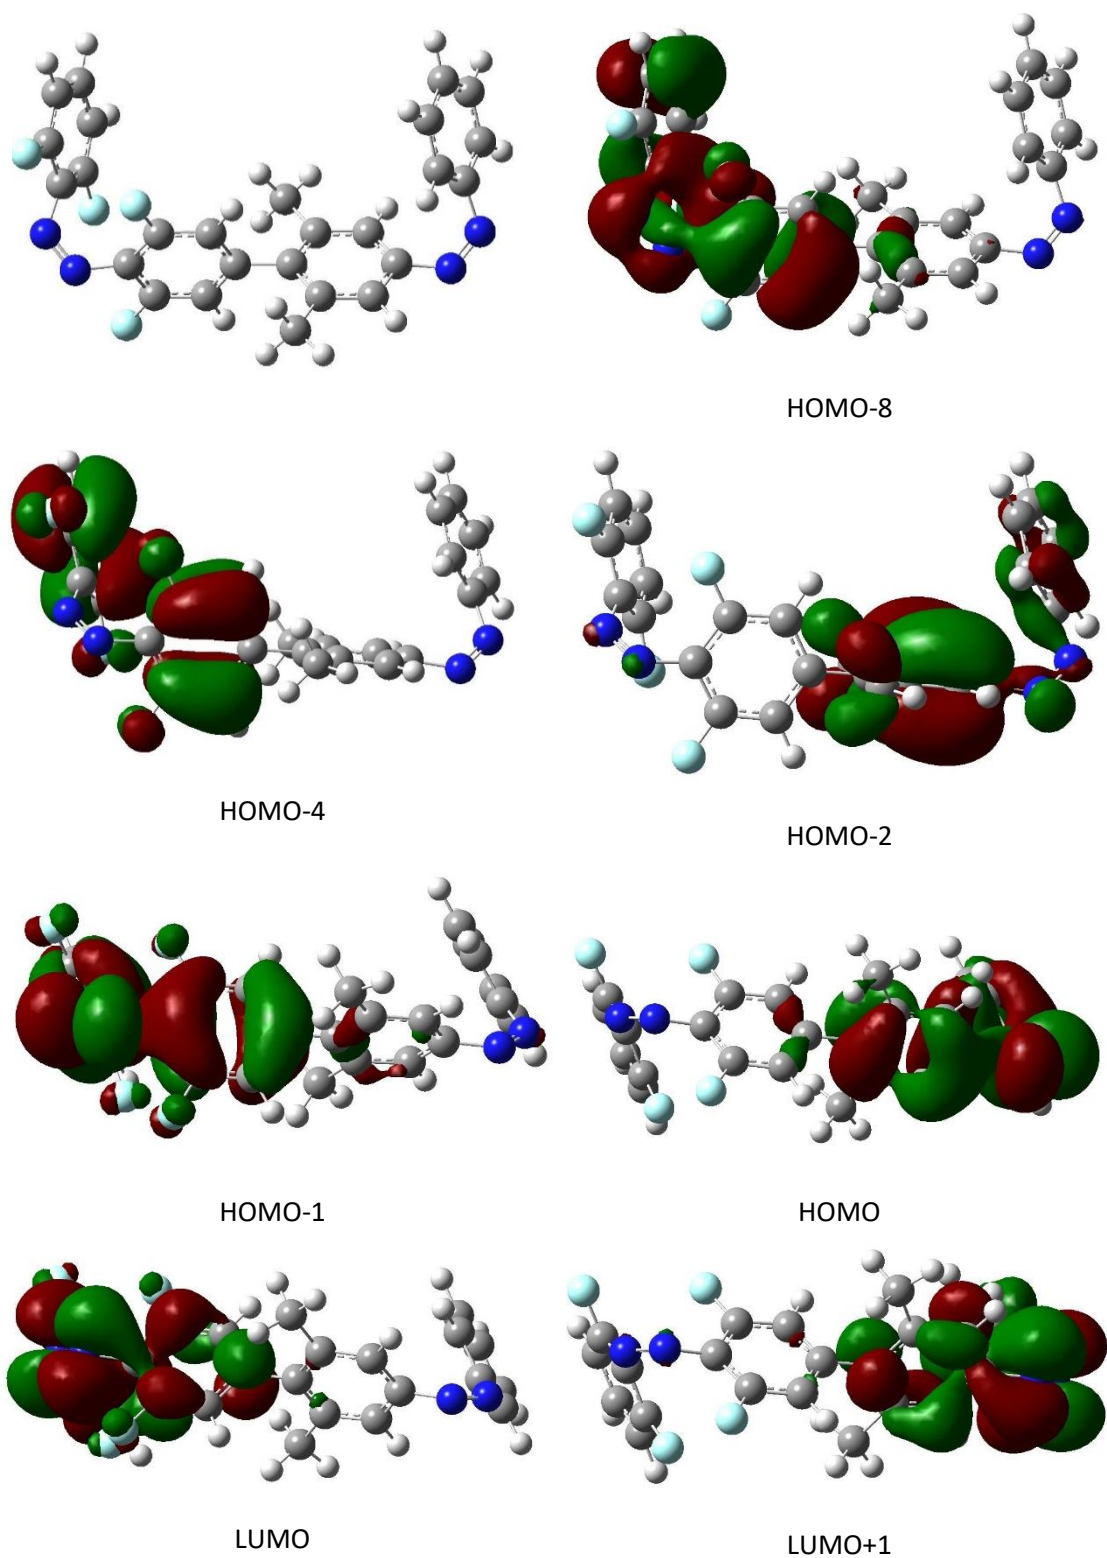

**FIGURE S3:** Shape of the molecular orbitals involved in the relevant excited electronic states of the ZZ isomer of dimer 1. The draws correspond to an iso-level of 0.02 a.u. of electronic density. The left top corner of the Figure depicts the molecular structure of the ZZ isomer.

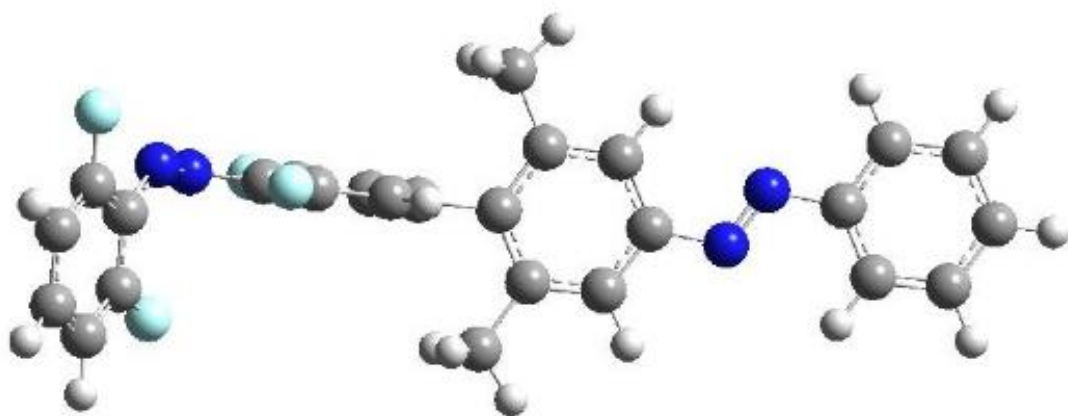

$EE \leftrightarrow EZ_F$

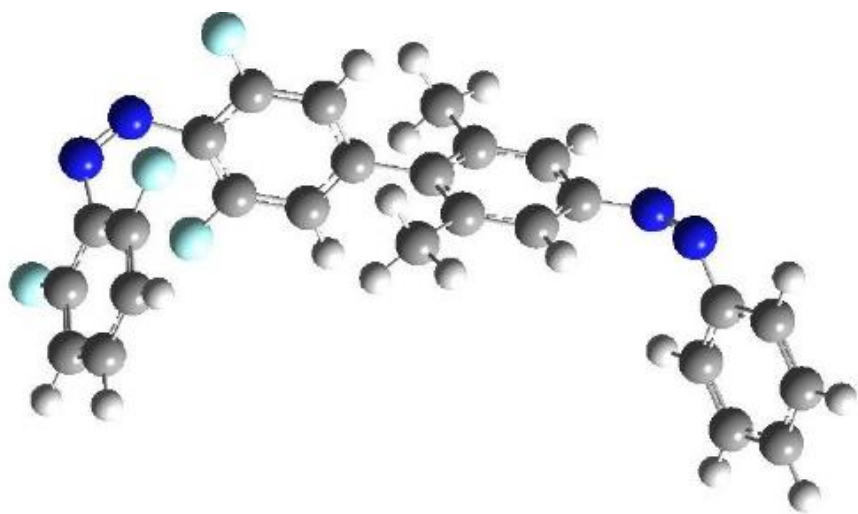

$EZ_F \leftrightarrow ZZ$

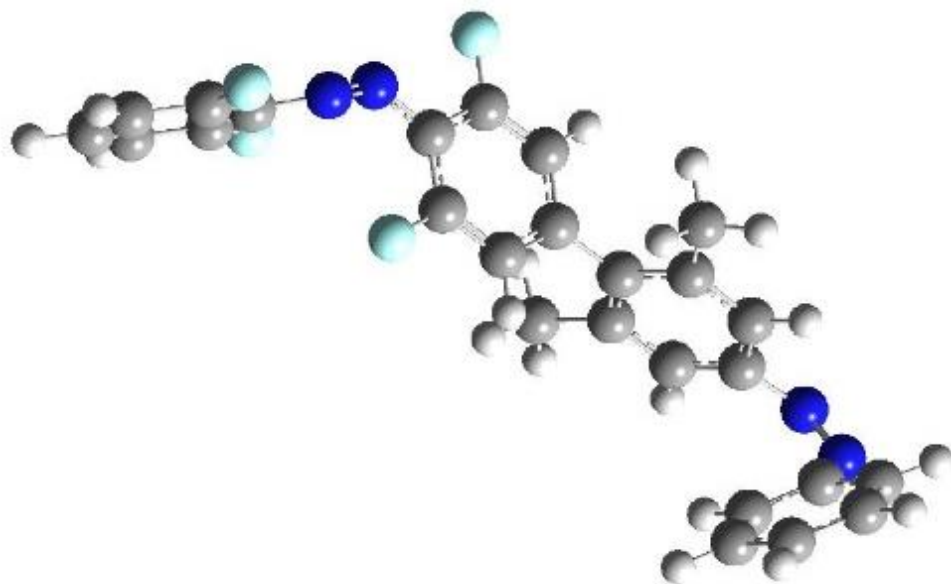

$ZE_F \leftrightarrow ZZ$

**FIGURE S4.** Approximate geometries of the conical intersections localized for dimer 1.



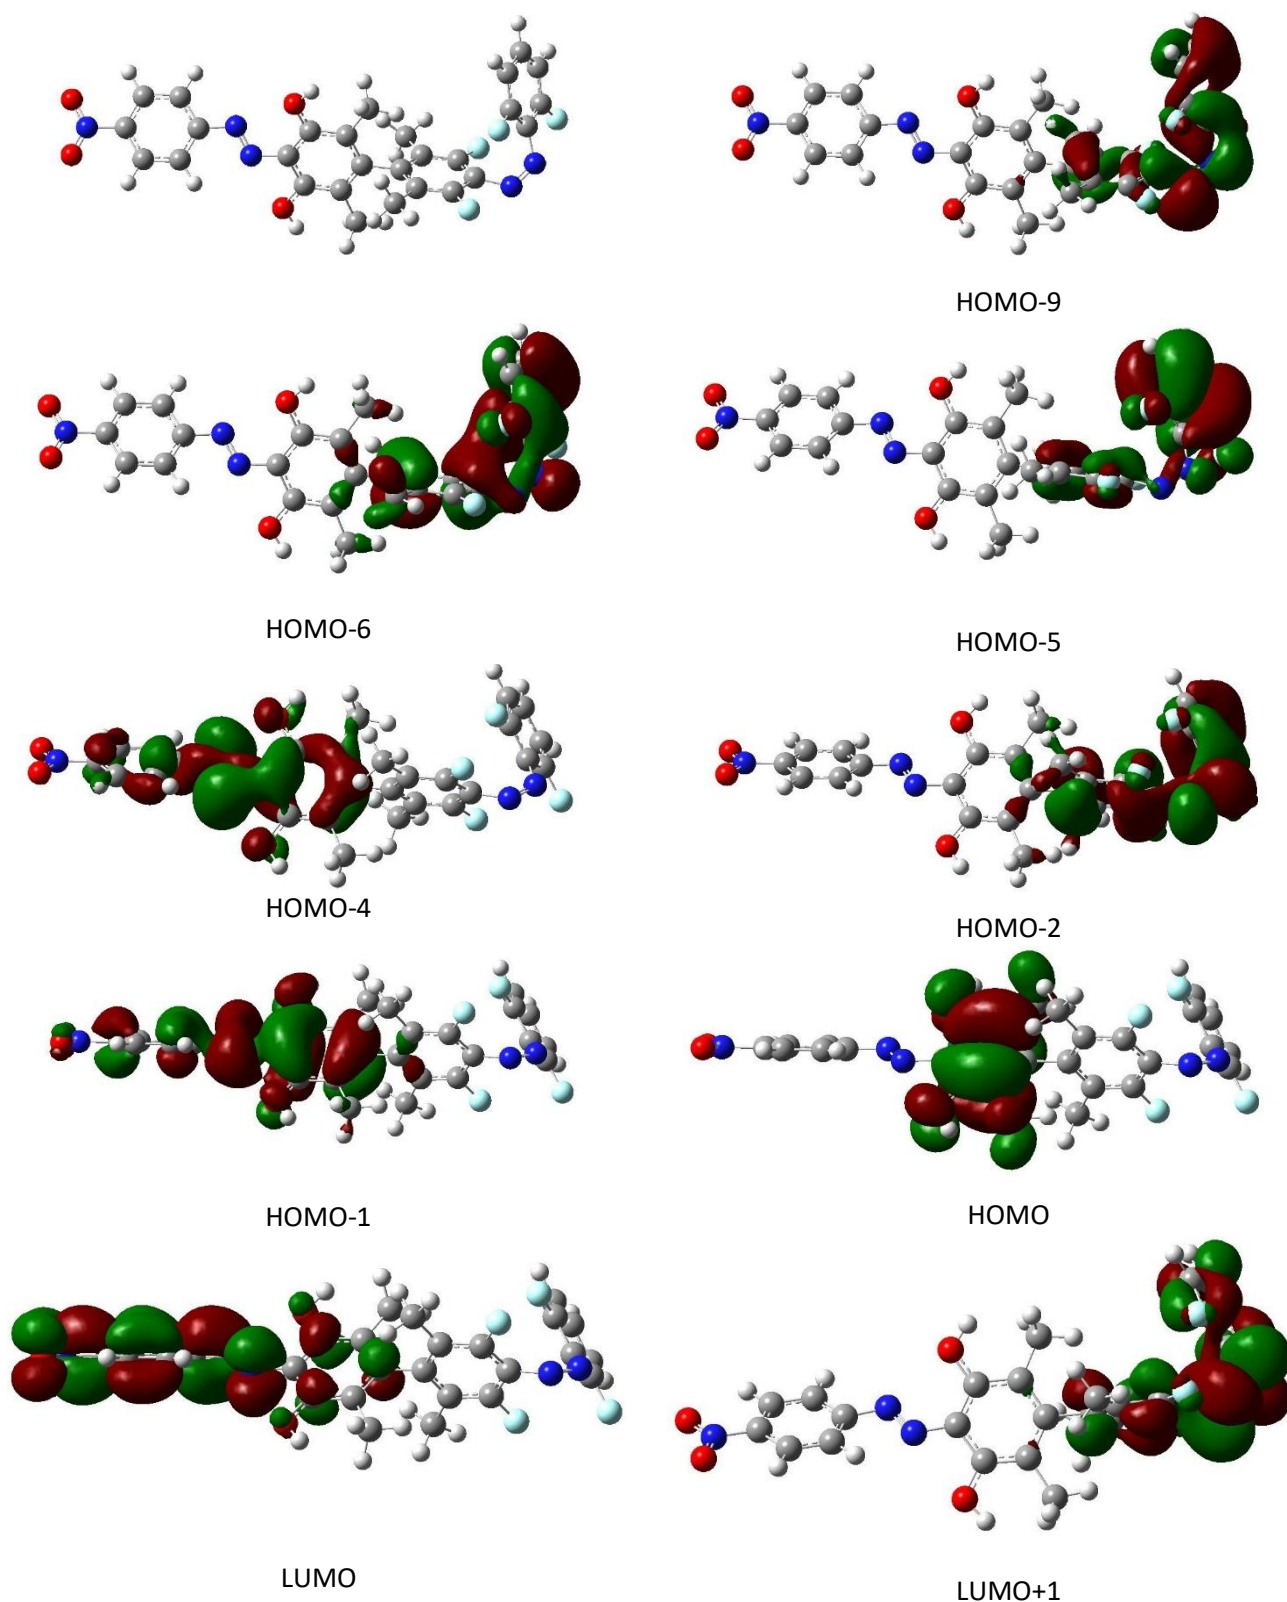

**FIGURE S5:** Shape of the molecular orbitals involved in the relevant excited electronic states of the  $\text{EpZ}_\text{F}$  isomer of dimer 2. The draws correspond to an iso-level of 0.02 a.u. of electronic density. The left top corner of the Figure depicts the molecular structure of the  $\text{EpZ}_\text{F}$  isomer.

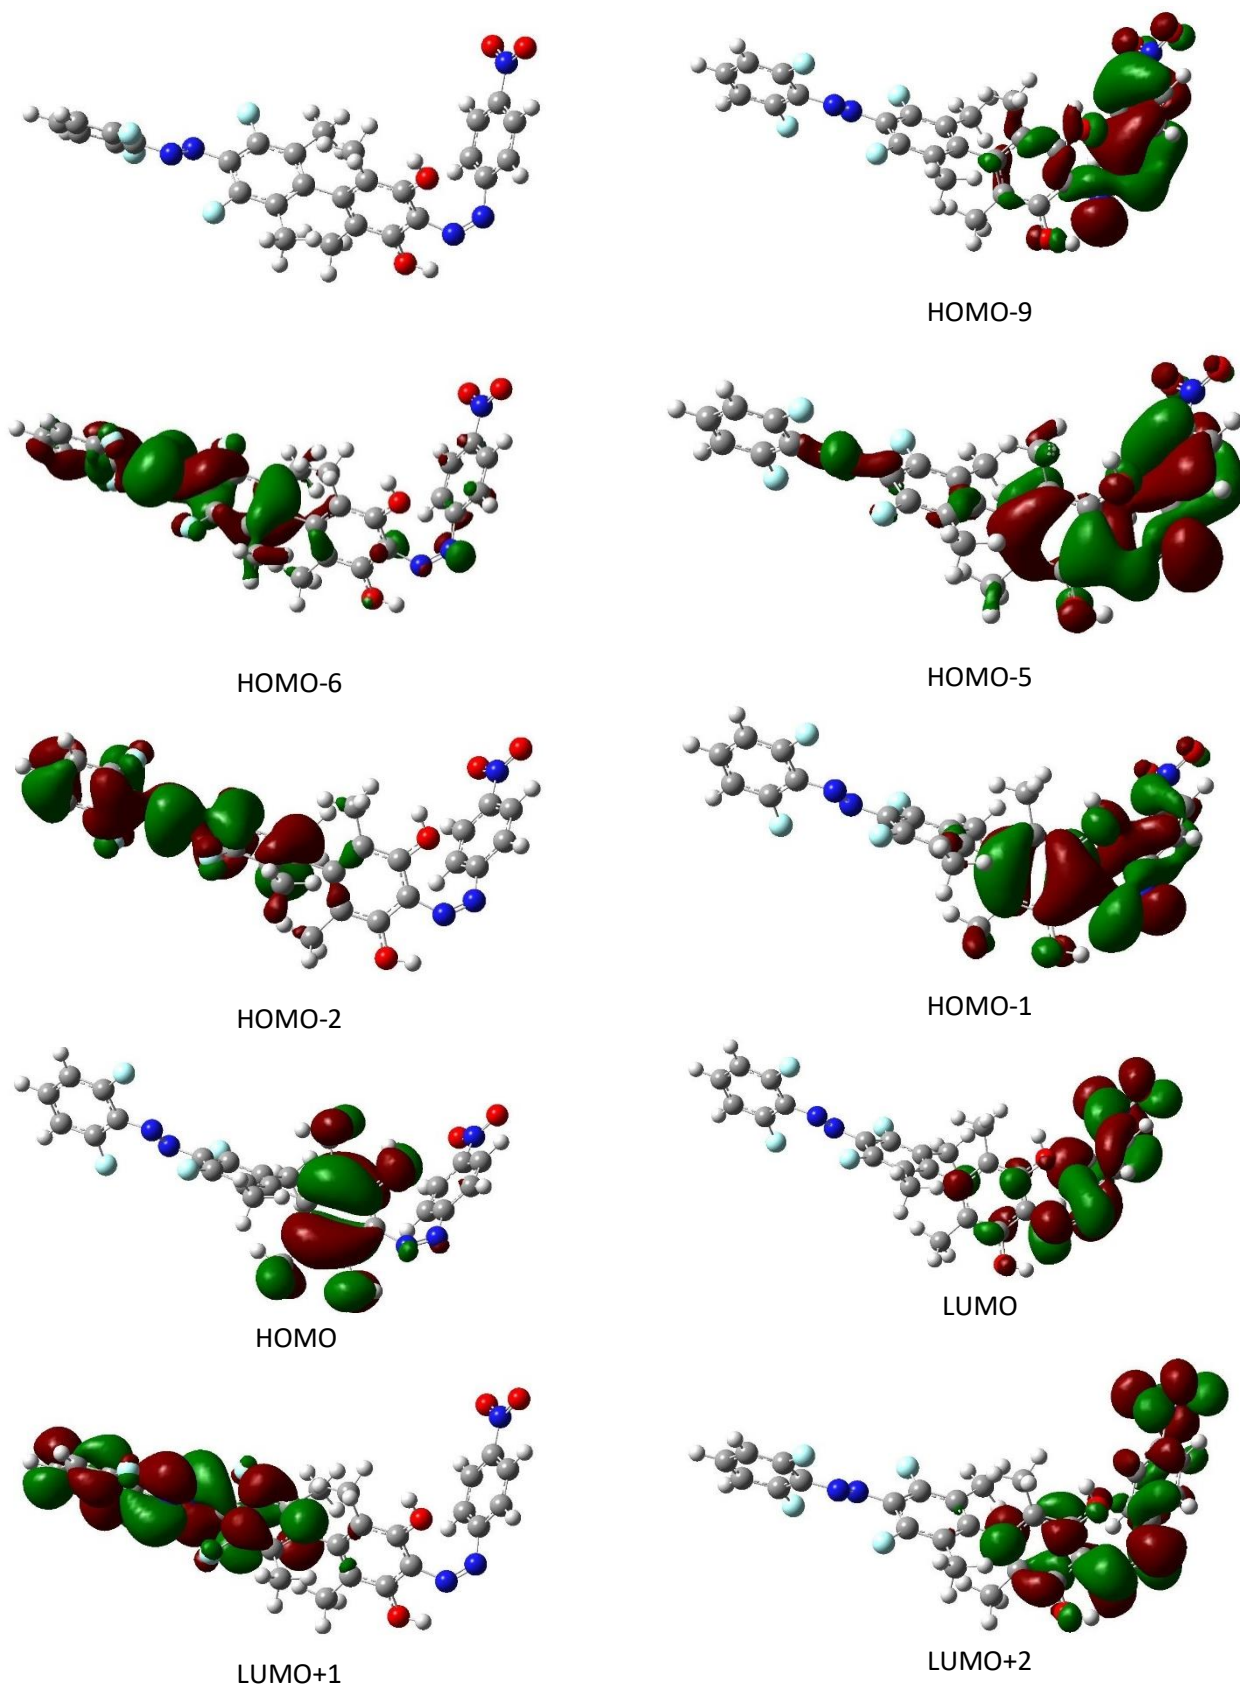

**FIGURE S6:** Shape of the molecular orbitals involved in the relevant excited electronic states of the  $Z_{PEF}$  isomer of dimer 2. The draws correspond to an iso-level of 0.02 a.u. of electronic density. The left top corner of the Figure depicts the molecular structure of the  $Z_{PEF}$  isomer.



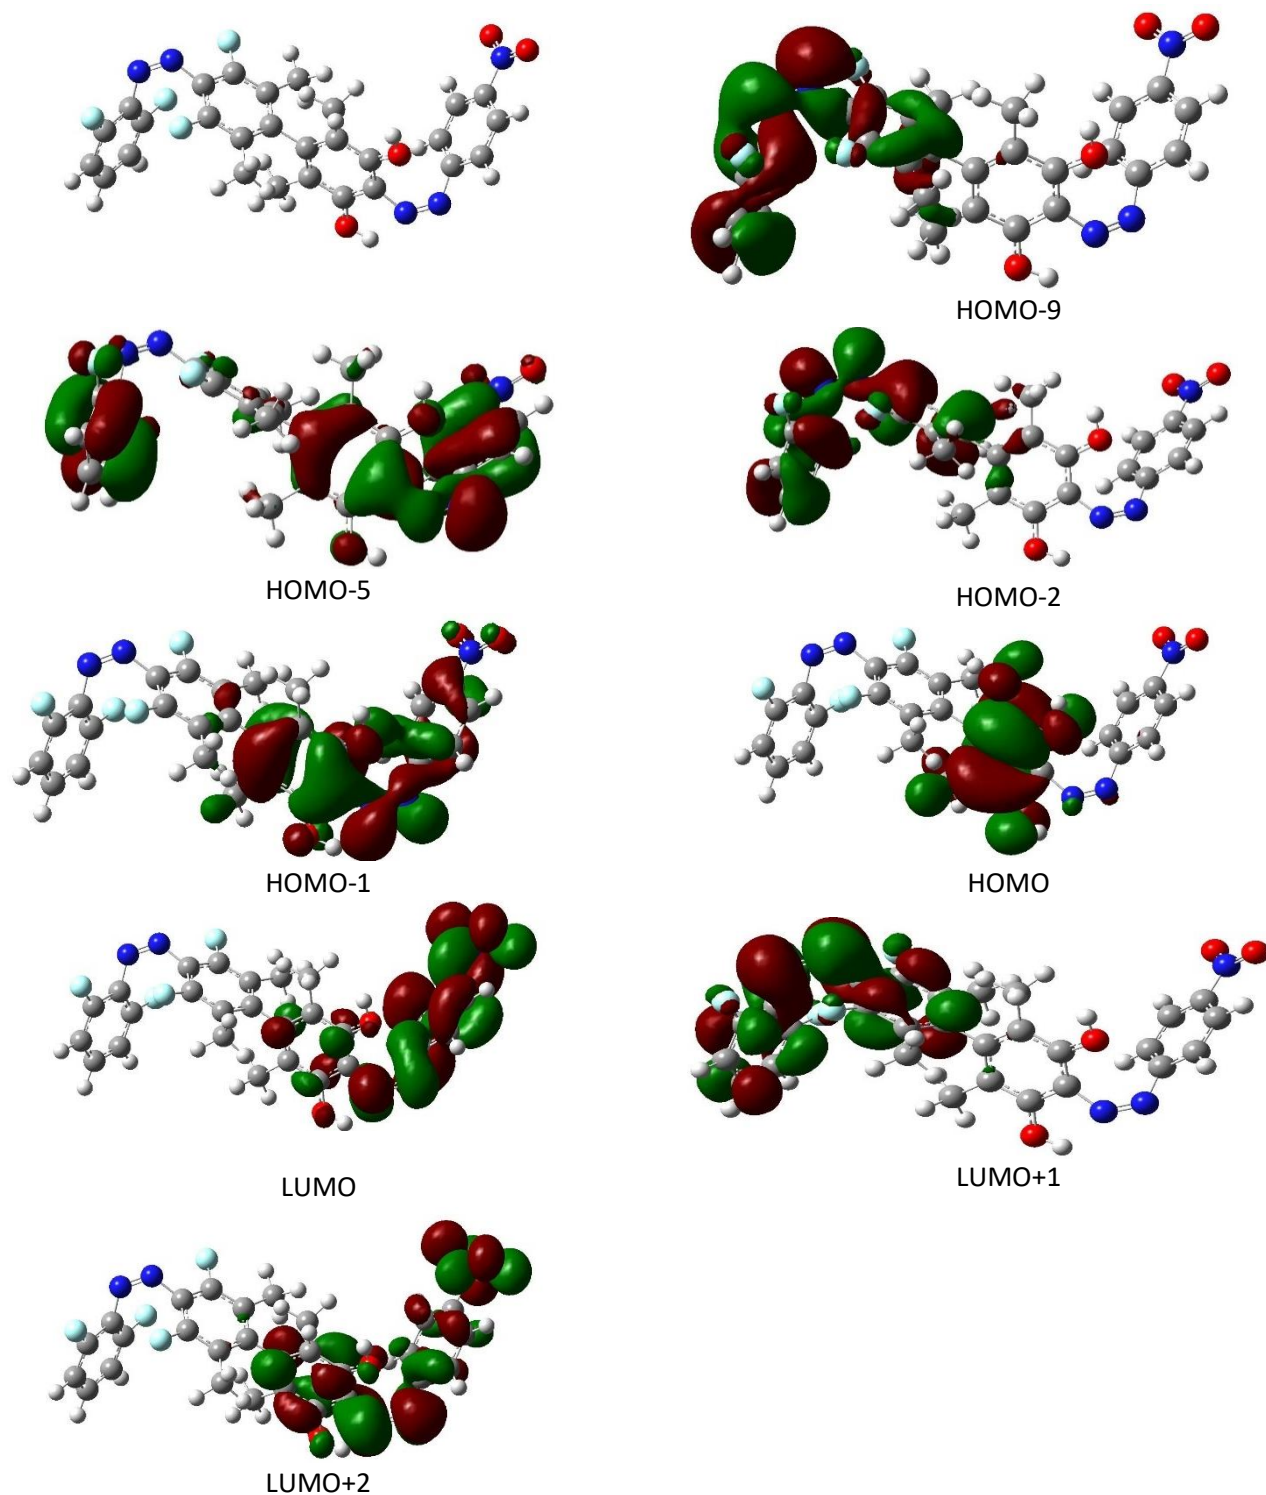

**FIGURE S7:** Shape of the molecular orbitals involved in the relevant excited electronic states of the ZZ isomer of dimer 2. The draws correspond to an iso-level of 0.02 a.u. of electronic density. The left top corner of the Figure depicts the molecular structure of the ZZ isomer.

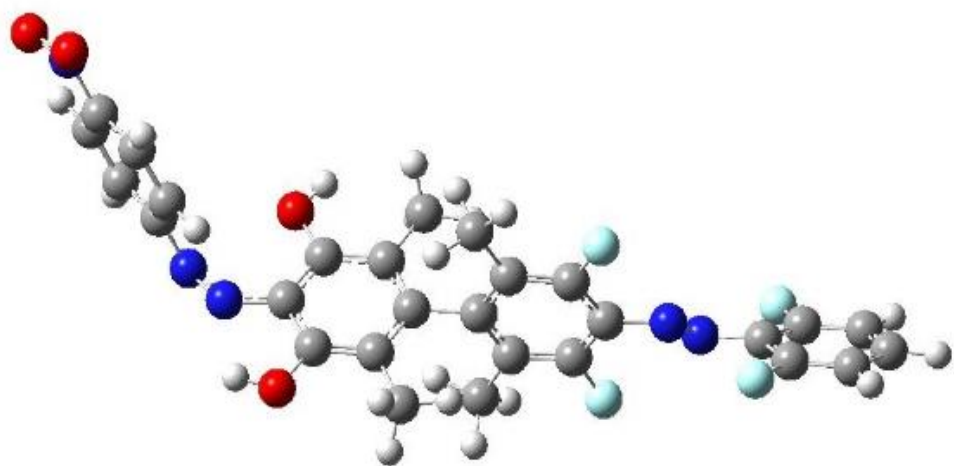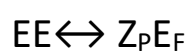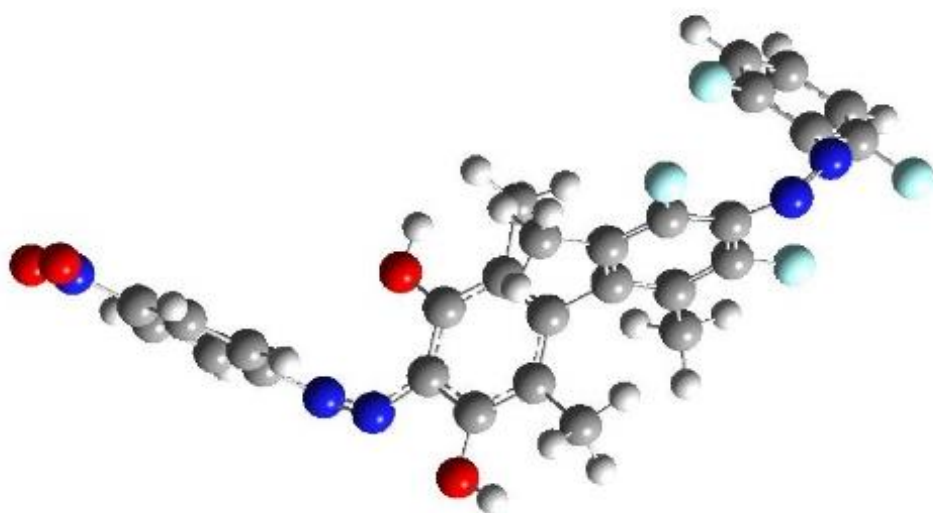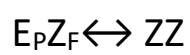

**FIGURE S8:** Approximate geometries of the conical intersections localized for dimer 2.

**Table S1.** Relative enthalpies and Gibbs free energies (kcal/mol) for the stationary points of dimer 1.

| Isomer                                     | $\Delta H$ | $\Delta G$ |
|--------------------------------------------|------------|------------|
| EE                                         | 0.00       | 0.00       |
| EZ <sub>F</sub>                            | 7.51       | 8.25       |
| ZE <sub>F</sub>                            | 12.89      | 13.37      |
| ZZ                                         | 20.40      | 22.36      |
| TS EE $\rightleftharpoons$ EZ <sub>F</sub> | 37.37      | 36.53      |
| TS EE $\rightleftharpoons$ ZE <sub>F</sub> | 38.89      | 39.71      |
| TS ZZ $\rightleftharpoons$ EZ <sub>F</sub> | 46.41      | 48.18      |
| TS ZZ $\rightleftharpoons$ ZE <sub>F</sub> | 50.22      | 49.64      |

**Table S2.** Comparison of the relative enthalpies and Gibbs free energies (kcal/mol) for the stationary points of dimer 2.

| Isomer                                                   | $\Delta H$ | $\Delta G$ |
|----------------------------------------------------------|------------|------------|
| EE                                                       | 0.00       | 0.00       |
| E <sub>P</sub> Z <sub>F</sub>                            | 7.20       | 8.94       |
| Z <sub>P</sub> E <sub>F</sub>                            | 6.77       | 8.56       |
| ZZ                                                       | 13.91      | 15.42      |
| TS EE $\rightleftharpoons$ E <sub>P</sub> Z <sub>F</sub> | 37.21      | 37.32      |
| TS EE $\rightleftharpoons$ Z <sub>P</sub> E <sub>F</sub> | 28.19      | 29.96      |
| TS ZZ $\rightleftharpoons$ E <sub>P</sub> Z <sub>F</sub> | 31.10      | 35.41      |
| TS ZZ $\rightleftharpoons$ Z <sub>P</sub> E <sub>F</sub> | 43.86      | 44.56      |

**Table S3.** Comparison of the relative energies (kcal/mol) of the stationary points of dimer 1 in the ground electronic state calculated using two different basis sets.

| Isomer                                     | 6-311+G(d,p) | DEF2-TZVP |
|--------------------------------------------|--------------|-----------|
| EE                                         | 0.00         | 0.00      |
| EZ <sub>F</sub>                            | 7.54         | 7.59      |
| ZE <sub>F</sub>                            | 13.01        | 12.86     |
| ZZ                                         | 20.54        | 20.45     |
| TS EE $\rightleftharpoons$ EZ <sub>F</sub> | 38.67        | 38.19     |
| TS EE $\rightleftharpoons$ ZE <sub>F</sub> | 40.33        | 39.54     |
| TS ZZ $\rightleftharpoons$ EZ <sub>F</sub> | 47.85        | 47.12     |
| TS ZZ $\rightleftharpoons$ ZE <sub>F</sub> | 51.65        | 51.04     |

**Table S4.** Comparison of the results of the relevant excited electronic states of dimer 1 calculated using two different basis sets.

| Isomer          | State          | 6-311+G(d,p) |                |      | DEF2-TZVP |                |      |
|-----------------|----------------|--------------|----------------|------|-----------|----------------|------|
|                 |                | E(eV)        | $\lambda$ (nm) | f    | E(eV)     | $\lambda$ (nm) | f    |
| EE              | S <sub>1</sub> | 2.67         | 464            | 0.10 | 2.66      | 466            | 0.09 |
|                 | S <sub>2</sub> | 2.75         | 451            | 0.00 | 2.73      | 454            | 0.00 |
|                 | S <sub>3</sub> | 3.74         | 331            | 1.61 | 3.78      | 328            | 1.69 |
|                 | S <sub>4</sub> | 4.10         | 302            | 0.78 | 4.11      | 301            | 0.76 |
| EZ <sub>F</sub> | S <sub>1</sub> | 2.75         | 451            | 0.00 | 2.73      | 454            | 0.00 |
|                 | S <sub>2</sub> | 2.89         | 430            | 0.06 | 2.89      | 429            | 0.05 |
|                 | S <sub>3</sub> | 3.75         | 330            | 1.29 | 3.79      | 327            | 1.33 |
|                 | S <sub>4</sub> | 4.32         | 287            | 0.08 | 4.36      | 284            | 0.08 |
| ZE <sub>F</sub> | S <sub>1</sub> | 2.67         | 465            | 0.09 | 2.66      | 466            | 0.08 |
|                 | S <sub>2</sub> | 2.78         | 445            | 0.05 | 2.79      | 444            | 0.04 |
|                 | S <sub>3</sub> | 4.06         | 305            | 1.33 | 4.08      | 304            | 1.36 |
|                 | S <sub>4</sub> | 4.47         | 277            | 0.07 | 4.49      | 276            | 0.07 |
|                 | S <sub>5</sub> | 4.47         | 277            | 0.03 | 4.49      | 276            | 0.02 |
|                 | S <sub>6</sub> | 4.48         | 276            | 0.16 | 4.55      | 273            | 0.17 |
| ZZ              | S <sub>1</sub> | 2.78         | 445            | 0.05 | 2.79      | 444            | 0.05 |
|                 | S <sub>2</sub> | 2.88         | 430            | 0.05 | 2.89      | 429            | 0.05 |
|                 | S <sub>3</sub> | 4.46         | 278            | 0.36 | 4.51      | 275            | 0.32 |
|                 | S <sub>4</sub> | 4.50         | 275            | 0.02 | 4.55      | 272            | 0.06 |
|                 | S <sub>5</sub> | 4.57         | 271            | 0.12 | 4.63      | 268            | 0.11 |

**Table S5:** Dimer 1. Cartesian coordinates of the EE isomer in Å.

|   |            |           |           |
|---|------------|-----------|-----------|
| 7 | -5.613536  | -0.461604 | -0.243803 |
| 7 | -6.267952  | 0.515739  | 0.148340  |
| 6 | -7.679887  | 0.397480  | 0.027748  |
| 6 | -8.414097  | 1.478146  | 0.506353  |
| 6 | -8.332988  | -0.704275 | -0.527813 |
| 6 | -9.800458  | 1.462671  | 0.436370  |
| 1 | -7.884401  | 2.322093  | 0.931088  |
| 6 | -9.715273  | -0.712723 | -0.595940 |
| 1 | -7.751962  | -1.537085 | -0.899411 |
| 6 | -10.451997 | 0.367739  | -0.114572 |
| 1 | -10.369984 | 2.304343  | 0.810716  |
| 1 | -10.226410 | -1.565101 | -1.027017 |
| 1 | -11.533674 | 0.352475  | -0.171861 |
| 6 | -4.201255  | -0.342097 | -0.126847 |
| 6 | -3.545312  | 0.783453  | 0.363673  |
| 6 | -3.472521  | -1.446599 | -0.543733 |
| 6 | -2.161099  | 0.808776  | 0.440588  |
| 1 | -4.124393  | 1.639023  | 0.683959  |
| 6 | -2.083018  | -1.452399 | -0.478171 |
| 1 | -4.006088  | -2.310111 | -0.922717 |
| 6 | -1.432455  | -0.316570 | 0.017145  |
| 6 | 0.058287   | -0.298684 | 0.096876  |
| 6 | 0.813640   | 0.144245  | -0.985216 |
| 6 | 0.705921   | -0.732463 | 1.250355  |
| 6 | 2.188384   | 0.166609  | -0.898972 |
| 1 | 0.342642   | 0.471613  | -1.903046 |
| 6 | 2.080672   | -0.712630 | 1.293348  |
| 1 | 0.153259   | -1.086568 | 2.110560  |
| 6 | 2.877206   | -0.252370 | 0.243278  |
| 7 | 4.271489   | -0.338183 | 0.413886  |
| 7 | 4.943330   | 0.463294  | -0.258748 |
| 6 | 6.339928   | 0.328320  | -0.130982 |
| 6 | 7.048237   | -0.854148 | 0.105385  |



|   |           |           |           |
|---|-----------|-----------|-----------|
| 6 | 7.111763  | 1.471701  | -0.347001 |
| 6 | 8.425583  | -0.895827 | 0.141219  |
| 6 | 8.487360  | 1.474803  | -0.300744 |
| 6 | 9.142013  | 0.276387  | -0.053475 |
| 1 | 8.918733  | -1.842501 | 0.316734  |
| 1 | 9.024887  | 2.399921  | -0.458182 |
| 1 | 10.223244 | 0.254138  | -0.017604 |
| 6 | -1.312984 | -2.663362 | -0.935182 |
| 1 | -0.643096 | -2.420288 | -1.762882 |
| 1 | -0.694943 | -3.069075 | -0.131407 |
| 1 | -1.992292 | -3.447189 | -1.268955 |
| 6 | -1.460977 | 2.032222  | 0.971844  |
| 1 | -0.872551 | 1.799236  | 1.862073  |
| 1 | -0.772605 | 2.448940  | 0.233386  |
| 1 | -2.183325 | 2.803989  | 1.235863  |
| 9 | 2.692783  | -1.139509 | 2.408963  |
| 9 | 2.874996  | 0.561910  | -1.979734 |
| 9 | 6.471428  | 2.626772  | -0.590414 |
| 9 | 6.379862  | -2.007286 | 0.253161  |

**Table S6:** Dimer 1. Cartesian coordinates of the EZ<sub>F</sub> isomer in Å.

|   |            |           |           |
|---|------------|-----------|-----------|
| 7 | -4.990845  | 0.437981  | 0.302187  |
| 7 | -5.521327  | -0.598450 | -0.124019 |
| 6 | -6.934418  | -0.668179 | 0.018359  |
| 6 | -7.533476  | -1.808112 | -0.508513 |
| 6 | -7.712237  | 0.310536  | 0.639773  |
| 6 | -8.909000  | -1.974061 | -0.421996 |
| 1 | -6.908346  | -2.554290 | -0.983572 |
| 6 | -9.082849  | 0.138012  | 0.724400  |
| 1 | -7.235151  | 1.190459  | 1.048954  |
| 6 | -9.684564  | -1.001669 | 0.194340  |
| 1 | -9.373386  | -2.861362 | -0.834248 |
| 1 | -9.690445  | 0.894162  | 1.206800  |
| 1 | -10.758108 | -1.128326 | 0.265058  |
| 6 | -3.576785  | 0.504352  | 0.166456  |
| 6 | -2.786286  | -0.525030 | -0.336708 |
| 6 | -2.992590  | 1.692598  | 0.580553  |
| 6 | -1.411782  | -0.369244 | -0.432152 |
| 1 | -3.252928  | -1.448819 | -0.651095 |
| 6 | -1.616800  | 1.880078  | 0.495674  |
| 1 | -3.629161  | 2.477713  | 0.970925  |
| 6 | -0.830246  | 0.840790  | -0.014203 |
| 6 | 0.648985   | 1.017913  | -0.116363 |
| 6 | 1.469321   | 0.715275  | 0.966205  |
| 6 | 1.218753   | 1.493621  | -1.296002 |
| 6 | 2.832810   | 0.872065  | 0.846277  |
| 1 | 1.060126   | 0.360892  | 1.903329  |
| 6 | 2.582989   | 1.652782  | -1.366387 |
| 1 | 0.610937   | 1.741833  | -2.156251 |
| 6 | 3.436617   | 1.325479  | -0.319919 |
| 7 | 4.820778   | 1.658037  | -0.421903 |
| 7 | 5.713655   | 0.835704  | -0.192582 |
| 6 | 5.436134   | -0.547508 | 0.027435  |

|   |           |           |           |
|---|-----------|-----------|-----------|
| 6 | 4.813330  | -1.366013 | -0.907924 |
| 6 | 5.984918  | -1.177286 | 1.138870  |
| 6 | 4.705862  | -2.730430 | -0.745139 |
| 6 | 5.885197  | -2.532978 | 1.352215  |
| 6 | 5.240112  | -3.308658 | 0.397135  |
| 1 | 4.214919  | -3.318766 | -1.508527 |
| 1 | 6.309708  | -2.964997 | 2.248279  |
| 1 | 5.158116  | -4.377532 | 0.543185  |
| 6 | -1.005377 | 3.180138  | 0.947533  |
| 1 | -0.316695 | 3.027631  | 1.781494  |
| 1 | -0.436362 | 3.653172  | 0.144445  |
| 1 | -1.778437 | 3.876404  | 1.271412  |
| 6 | -0.565830 | -1.490769 | -0.975956 |
| 1 | -0.034892 | -1.186426 | -1.880642 |
| 1 | 0.189206  | -1.806440 | -0.252721 |
| 1 | -1.183873 | -2.354086 | -1.220660 |
| 9 | 3.134127  | 2.117893  | -2.499494 |
| 9 | 3.614918  | 0.611567  | 1.909768  |
| 9 | 6.610940  | -0.408014 | 2.045231  |
| 9 | 4.331371  | -0.798818 | -2.029474 |

**Table S7:** Dimer 1. Cartesian coordinates of the Z<sub>E</sub>F isomer in Å.

|   |           |           |           |
|---|-----------|-----------|-----------|
| 7 | -6.065481 | -1.686906 | 0.210317  |
| 7 | -6.940016 | -0.815249 | 0.160156  |
| 6 | -6.656721 | 0.569097  | -0.096648 |
| 6 | -7.258569 | 1.501753  | 0.740538  |
| 6 | -5.951907 | 0.981982  | -1.223603 |
| 6 | -7.095345 | 2.855964  | 0.488873  |
| 1 | -7.840041 | 1.158652  | 1.587740  |
| 6 | -5.822251 | 2.338024  | -1.485800 |
| 1 | -5.519681 | 0.251209  | -1.894665 |
| 6 | -6.379228 | 3.276989  | -0.625491 |
| 1 | -7.543437 | 3.583495  | 1.154530  |
| 1 | -5.281911 | 2.662021  | -2.366948 |
| 1 | -6.267528 | 4.334418  | -0.831429 |
| 6 | -4.660279 | -1.393436 | 0.169088  |
| 6 | -4.063559 | -0.537565 | 1.084061  |
| 6 | -3.885881 | -2.125643 | -0.717557 |
| 6 | -2.682458 | -0.378445 | 1.095714  |
| 1 | -4.670546 | 0.002375  | 1.799672  |
| 6 | -2.506148 | -1.961539 | -0.750169 |
| 1 | -4.368001 | -2.819941 | -1.395667 |
| 6 | -1.907934 | -1.084052 | 0.164661  |
| 6 | -0.425043 | -0.909925 | 0.158529  |
| 6 | 0.158647  | 0.107643  | -0.591104 |
| 6 | 0.387967  | -1.765228 | 0.897383  |
| 6 | 1.526512  | 0.270808  | -0.580120 |
| 1 | -0.442345 | 0.778814  | -1.190895 |
| 6 | 1.751174  | -1.583063 | 0.870091  |
| 1 | -0.028096 | -2.568613 | 1.490917  |
| 6 | 2.377090  | -0.560217 | 0.155290  |
| 7 | 3.783659  | -0.524997 | 0.188272  |
| 7 | 4.293755  | 0.589245  | -0.023783 |
| 6 | 5.701626  | 0.612191  | -0.049416 |

|   |           |           |           |
|---|-----------|-----------|-----------|
| 6 | 6.552438  | -0.424868 | -0.445756 |
| 6 | 6.320567  | 1.821890  | 0.273439  |
| 6 | 7.921737  | -0.276830 | -0.501602 |
| 6 | 7.684594  | 2.003893  | 0.247675  |
| 6 | 8.484805  | 0.939778  | -0.143695 |
| 1 | 8.528077  | -1.111600 | -0.826709 |
| 1 | 8.101083  | 2.961792  | 0.527876  |
| 1 | 9.559534  | 1.061275  | -0.175737 |
| 6 | -1.683460 | -2.734515 | -1.746963 |
| 1 | -1.106232 | -2.065303 | -2.388656 |
| 1 | -0.970226 | -3.394071 | -1.247878 |
| 1 | -2.323037 | -3.345983 | -2.382750 |
| 6 | -2.046742 | 0.547509  | 2.099250  |
| 1 | -1.312990 | 0.023268  | 2.715162  |
| 1 | -1.522047 | 1.367994  | 1.604691  |
| 1 | -2.799759 | 0.977223  | 2.759199  |
| 9 | 2.523395  | -2.417552 | 1.583623  |
| 9 | 2.045924  | 1.237848  | -1.348996 |
| 9 | 5.539616  | 2.848589  | 0.646497  |
| 9 | 6.030393  | -1.596092 | -0.837036 |



**Table S8:** Dimer 1. Cartesian coordinates of the ZZ isomer in Å.

|   |           |           |           |
|---|-----------|-----------|-----------|
| 7 | 5.505175  | 1.507038  | 0.374869  |
| 7 | 6.275430  | 0.541219  | 0.340504  |
| 6 | 5.853277  | -0.790142 | 0.006375  |
| 6 | 6.287897  | -1.816653 | 0.837282  |
| 6 | 5.181873  | -1.076754 | -1.178670 |
| 6 | 5.987589  | -3.132421 | 0.517250  |
| 1 | 6.847726  | -1.574982 | 1.732708  |
| 6 | 4.915397  | -2.397901 | -1.507271 |
| 1 | 4.880956  | -0.276613 | -1.842346 |
| 6 | 5.303031  | -3.426214 | -0.656189 |
| 1 | 6.304571  | -3.930950 | 1.176840  |
| 1 | 4.400914  | -2.624199 | -2.433268 |
| 1 | 5.084936  | -4.455166 | -0.914500 |
| 6 | 4.081566  | 1.382287  | 0.234278  |
| 6 | 3.332030  | 0.567417  | 1.070804  |
| 6 | 3.455779  | 2.234425  | -0.662374 |
| 6 | 1.943968  | 0.572477  | 0.993214  |
| 1 | 3.825443  | -0.068746 | 1.794579  |
| 6 | 2.071460  | 2.233360  | -0.786918 |
| 1 | 4.057534  | 2.895247  | -1.275142 |
| 6 | 1.317536  | 1.398136  | 0.049453  |
| 6 | -0.172354 | 1.402253  | -0.052797 |
| 6 | -0.814931 | 0.599803  | -0.990743 |
| 6 | -0.931928 | 2.216373  | 0.785843  |
| 6 | -2.190785 | 0.609324  | -1.061335 |
| 1 | -0.257578 | -0.031749 | -1.670208 |
| 6 | -2.302102 | 2.209090  | 0.669227  |
| 1 | -0.466217 | 2.856606  | 1.523586  |
| 6 | -2.979953 | 1.393659  | -0.229102 |
| 7 | -4.388755 | 1.556160  | -0.386183 |
| 7 | -5.170494 | 0.600108  | -0.353059 |
| 6 | -4.751124 | -0.715297 | 0.009577  |

|   |           |           |           |
|---|-----------|-----------|-----------|
| 6 | -4.184211 | -1.032356 | 1.238728  |
| 6 | -5.101650 | -1.783422 | -0.808743 |
| 6 | -3.942849 | -2.331345 | 1.631339  |
| 6 | -4.862501 | -3.094492 | -0.466498 |
| 6 | -4.279262 | -3.361940 | 0.765719  |
| 1 | -3.504031 | -2.519485 | 2.601904  |
| 1 | -5.133705 | -3.883922 | -1.154257 |
| 1 | -4.090329 | -4.386824 | 1.056378  |
| 6 | 1.410599  | 3.134825  | -1.796162 |
| 1 | 0.906904  | 2.555817  | -2.573703 |
| 1 | 0.655130  | 3.770022  | -1.329606 |
| 1 | 2.146271  | 3.777531  | -2.278962 |
| 6 | 1.143884  | -0.309161 | 1.916037  |
| 1 | 0.515944  | 0.282828  | 2.585691  |
| 1 | 0.480210  | -0.971991 | 1.356891  |
| 1 | 1.802480  | -0.924672 | 2.528061  |
| 9 | -3.035317 | 2.999248  | 1.470733  |
| 9 | -2.799952 | -0.142033 | -1.996888 |
| 9 | -5.671930 | -1.500776 | -1.991992 |
| 9 | -3.897252 | -0.026706 | 2.086202  |

**Table S9:** Dimer 1. Cartesian coordinates of the EE to EZ<sub>F</sub> transition state in Å.

|   |           |           |           |
|---|-----------|-----------|-----------|
| 7 | 5.395990  | 0.343137  | -0.476921 |
| 7 | 6.065879  | -0.551784 | 0.059201  |
| 6 | 7.456607  | -0.538872 | -0.236712 |
| 6 | 8.206165  | -1.543934 | 0.366541  |
| 6 | 8.075677  | 0.395901  | -1.068661 |
| 6 | 9.574090  | -1.620693 | 0.142776  |
| 1 | 7.702795  | -2.257105 | 1.007824  |
| 6 | 9.439742  | 0.313704  | -1.287544 |
| 1 | 7.483087  | 1.172694  | -1.532011 |
| 6 | 10.191740 | -0.692362 | -0.684060 |
| 1 | 10.155695 | -2.403821 | 0.613243  |
| 1 | 9.924647  | 1.036710  | -1.932328 |
| 1 | 11.258973 | -0.749037 | -0.861113 |
| 6 | 4.004923  | 0.329565  | -0.180558 |
| 6 | 3.386878  | -0.603188 | 0.647464  |
| 6 | 3.257548  | 1.332653  | -0.780439 |
| 6 | 2.021339  | -0.537581 | 0.878892  |
| 1 | 3.980326  | -1.380538 | 1.109458  |
| 6 | 1.886020  | 1.425968  | -0.568195 |
| 1 | 3.762025  | 2.046455  | -1.420647 |
| 6 | 1.274598  | 0.483102  | 0.265487  |
| 6 | -0.196508 | 0.562129  | 0.506885  |
| 6 | -1.079020 | -0.117983 | -0.330798 |
| 6 | -0.693493 | 1.315317  | 1.566773  |
| 6 | -2.431668 | -0.035125 | -0.099510 |
| 1 | -0.722354 | -0.712122 | -1.162038 |
| 6 | -2.053622 | 1.373235  | 1.767899  |
| 1 | -0.034890 | 1.854376  | 2.234787  |
| 6 | -2.971226 | 0.709343  | 0.952568  |
| 7 | -4.348230 | 0.864334  | 1.297001  |
| 7 | -5.185716 | 0.324634  | 0.602125  |
| 6 | -6.118367 | -0.260725 | -0.131190 |

|   |           |           |           |
|---|-----------|-----------|-----------|
| 6 | -6.799023 | 0.410410  | -1.159475 |
| 6 | -6.493072 | -1.599719 | 0.062765  |
| 6 | -7.768435 | -0.186929 | -1.926924 |
| 6 | -7.468109 | -2.217840 | -0.680762 |
| 6 | -8.115471 | -1.512527 | -1.689341 |
| 1 | -8.245724 | 0.396080  | -2.704187 |
| 1 | -7.706888 | -3.251458 | -0.465243 |
| 1 | -8.881136 | -1.990544 | -2.283890 |
| 6 | 1.093325  | 2.522786  | -1.229009 |
| 1 | 0.318765  | 2.115977  | -1.882918 |
| 1 | 0.591888  | 3.152250  | -0.490693 |
| 1 | 1.743344  | 3.158267  | -1.829637 |
| 6 | 1.361684  | -1.551301 | 1.776671  |
| 1 | 0.879536  | -1.072034 | 2.631605  |
| 1 | 0.589085  | -2.111473 | 1.245266  |
| 1 | 2.094708  | -2.262359 | 2.156133  |
| 9 | -2.518880 | 2.099678  | 2.791038  |
| 9 | -3.257989 | -0.700503 | -0.917528 |
| 9 | -5.847051 | -2.271023 | 1.046864  |
| 9 | -6.447554 | 1.701117  | -1.375120 |

**Table S10:** Dimer 1. Cartesian coordinates of the EE to ZEF transition state in Å.

|   |           |           |           |
|---|-----------|-----------|-----------|
| 7 | 5.684121  | 1.531366  | -0.645124 |
| 7 | 6.470389  | 0.653235  | -0.357320 |
| 6 | 7.330641  | -0.307965 | -0.034929 |
| 6 | 7.743451  | -1.253480 | -1.000215 |
| 6 | 7.857285  | -0.386549 | 1.273881  |
| 6 | 8.654878  | -2.232908 | -0.648393 |
| 1 | 7.342457  | -1.199713 | -2.003717 |
| 6 | 8.766387  | -1.382169 | 1.583690  |
| 1 | 7.543995  | 0.333819  | 2.017978  |
| 6 | 9.179114  | -2.315588 | 0.637870  |
| 1 | 8.959893  | -2.948506 | -1.403712 |
| 1 | 9.159769  | -1.425065 | 2.593185  |
| 1 | 9.890912  | -3.088365 | 0.896855  |
| 6 | 4.276336  | 1.246503  | -0.466555 |
| 6 | 3.791150  | 0.028798  | -0.011884 |
| 6 | 3.418216  | 2.283699  | -0.784556 |
| 6 | 2.424749  | -0.162451 | 0.130627  |
| 1 | 4.480402  | -0.771153 | 0.229862  |
| 6 | 2.042417  | 2.123846  | -0.651099 |
| 1 | 3.834109  | 3.220016  | -1.137510 |
| 6 | 1.554868  | 0.894137  | -0.192112 |
| 6 | 0.081805  | 0.700085  | -0.044340 |
| 6 | -0.674711 | 0.237754  | -1.117107 |
| 6 | -0.547464 | 0.988498  | 1.163139  |
| 6 | -2.032131 | 0.054019  | -0.969881 |
| 1 | -0.219403 | 0.020420  | -2.074653 |
| 6 | -1.907427 | 0.809084  | 1.267435  |
| 1 | 0.006836  | 1.352795  | 2.017964  |
| 6 | -2.702593 | 0.324403  | 0.227109  |
| 7 | -4.086451 | 0.240179  | 0.468498  |
| 7 | -4.704046 | -0.577324 | -0.236381 |
| 6 | -6.096994 | -0.614834 | -0.033385 |



|   |           |           |           |
|---|-----------|-----------|-----------|
| 6 | -6.917672 | 0.445483  | 0.365414  |
| 6 | -6.748849 | -1.811210 | -0.340902 |
| 6 | -8.286705 | 0.321916  | 0.467491  |
| 6 | -8.110687 | -1.979493 | -0.233938 |
| 6 | -8.878725 | -0.898486 | 0.175146  |
| 1 | -8.870962 | 1.180527  | 0.770138  |
| 1 | -8.550604 | -2.938784 | -0.470110 |
| 1 | -9.951921 | -1.006224 | 0.261621  |
| 6 | 1.114834  | 3.258049  | -0.997772 |
| 1 | 0.432948  | 2.981215  | -1.804691 |
| 1 | 0.499870  | 3.544446  | -0.142072 |
| 1 | 1.680126  | 4.132898  | -1.317327 |
| 6 | 1.895857  | -1.483718 | 0.622553  |
| 1 | 1.332675  | -1.364966 | 1.550661  |
| 1 | 1.220756  | -1.937332 | -0.106202 |
| 1 | 2.712888  | -2.179988 | 0.808444  |
| 9 | -2.502543 | 1.096684  | 2.435259  |
| 9 | -2.724846 | -0.354575 | -2.041226 |
| 9 | -5.999861 | -2.851049 | -0.741839 |
| 9 | -6.375086 | 1.646410  | 0.612457  |

**Table S11:** Dimer 1. Cartesian coordinates of the ZZ to EZ<sub>F</sub> transition state in Å.

|   |           |           |           |
|---|-----------|-----------|-----------|
| 7 | -5.078680 | -1.550918 | -0.701194 |
| 7 | -5.773390 | -0.589189 | -0.446926 |
| 6 | -6.532543 | 0.466757  | -0.170394 |
| 6 | -7.084981 | 0.633236  | 1.119321  |
| 6 | -6.811074 | 1.428276  | -1.167517 |
| 6 | -7.888041 | 1.729030  | 1.380176  |
| 1 | -6.873578 | -0.098826 | 1.887527  |
| 6 | -7.619124 | 2.509407  | -0.864330 |
| 1 | -6.389640 | 1.307086  | -2.156708 |
| 6 | -8.168112 | 2.679163  | 0.402955  |
| 1 | -8.303433 | 1.838572  | 2.375708  |
| 1 | -7.822229 | 3.235801  | -1.643284 |
| 1 | -8.798173 | 3.530824  | 0.623494  |
| 6 | -3.654166 | -1.416963 | -0.483011 |
| 6 | -3.057657 | -0.264852 | 0.008853  |
| 6 | -2.900073 | -2.532291 | -0.800346 |
| 6 | -1.683154 | -0.220040 | 0.189469  |
| 1 | -3.666677 | 0.597681  | 0.251086  |
| 6 | -1.518728 | -2.517765 | -0.633403 |
| 1 | -3.401494 | -3.414566 | -1.180333 |
| 6 | -0.918464 | -1.354411 | -0.136426 |
| 6 | 0.562767  | -1.316079 | 0.050862  |
| 6 | 1.391919  | -0.941180 | -1.001615 |
| 6 | 1.124716  | -1.663375 | 1.277790  |
| 6 | 2.755216  | -0.902440 | -0.806856 |
| 1 | 0.990938  | -0.681191 | -1.972604 |
| 6 | 2.492000  | -1.628686 | 1.422860  |
| 1 | 0.509834  | -1.962517 | 2.116543  |
| 6 | 3.349549  | -1.225933 | 0.406494  |
| 7 | 4.758400  | -1.364701 | 0.589028  |
| 7 | 5.544435  | -0.437020 | 0.371768  |
| 6 | 5.097220  | 0.888505  | 0.086803  |

|   |           |           |           |
|---|-----------|-----------|-----------|
| 6 | 4.323309  | 1.643866  | 0.960510  |
| 6 | 5.616312  | 1.552511  | -1.018978 |
| 6 | 4.046776  | 2.976609  | 0.743626  |
| 6 | 5.350646  | 2.875951  | -1.285946 |
| 6 | 4.559928  | 3.586683  | -0.391782 |
| 1 | 3.443592  | 3.516928  | 1.460659  |
| 1 | 5.761549  | 3.333992  | -2.175393 |
| 1 | 4.346254  | 4.630441  | -0.580136 |
| 6 | -0.704881 | -3.734707 | -0.985016 |
| 1 | -0.001781 | -3.521839 | -1.793211 |
| 1 | -0.117948 | -4.081331 | -0.132084 |
| 1 | -1.352283 | -4.549901 | -1.306516 |
| 6 | -1.033939 | 1.028351  | 0.725466  |
| 1 | -0.532930 | 0.837196  | 1.676967  |
| 1 | -0.278089 | 1.410445  | 0.036202  |
| 1 | -1.775895 | 1.810088  | 0.884623  |
| 9 | 3.037814  | -1.971429 | 2.600988  |
| 9 | 3.551844  | -0.573883 | -1.839913 |
| 9 | 6.386138  | 0.847393  | -1.864653 |
| 9 | 3.861327  | 1.050828  | 2.077059  |

**Table S12:** Dimer 1. Cartesian coordinates of the ZZ to ZE<sub>F</sub> transition state in Å.

|   |           |           |           |
|---|-----------|-----------|-----------|
| 7 | 5.965657  | -1.358786 | 0.498934  |
| 7 | 6.746251  | -0.407377 | 0.387286  |
| 6 | 6.310444  | 0.951375  | 0.224971  |
| 6 | 6.916929  | 1.693335  | -0.782261 |
| 6 | 5.445206  | 1.560857  | 1.128773  |
| 6 | 6.601930  | 3.036094  | -0.929501 |
| 1 | 7.621440  | 1.210017  | -1.448320 |
| 6 | 5.162073  | 2.912196  | 0.993986  |
| 1 | 5.007546  | 0.987722  | 1.935710  |
| 6 | 5.726266  | 3.648881  | -0.040821 |
| 1 | 7.055086  | 3.609091  | -1.729174 |
| 1 | 4.496067  | 3.391179  | 1.701352  |
| 1 | 5.494975  | 4.701747  | -0.145659 |
| 6 | 4.545381  | -1.233459 | 0.327527  |
| 6 | 3.991912  | -0.729269 | -0.840861 |
| 6 | 3.736496  | -1.789493 | 1.306574  |
| 6 | 2.614283  | -0.744970 | -1.026378 |
| 1 | 4.632183  | -0.330333 | -1.617369 |
| 6 | 2.354116  | -1.786657 | 1.163922  |
| 1 | 4.191585  | -2.216951 | 2.192240  |
| 6 | 1.798468  | -1.262467 | -0.011220 |
| 6 | 0.316354  | -1.269731 | -0.190439 |
| 6 | -0.449346 | -0.204378 | 0.281085  |
| 6 | -0.308348 | -2.338702 | -0.826996 |
| 6 | -1.813161 | -0.221929 | 0.108931  |
| 1 | 0.007672  | 0.639638  | 0.781026  |
| 6 | -1.675893 | -2.322408 | -0.979050 |
| 1 | 0.257448  | -3.180809 | -1.202903 |
| 6 | -2.478199 | -1.274793 | -0.524765 |
| 7 | -3.880824 | -1.409361 | -0.754792 |
| 7 | -4.616578 | -0.507664 | -0.407206 |
| 6 | -5.440467 | 0.459653  | -0.038895 |

|   |           |           |           |
|---|-----------|-----------|-----------|
| 6 | -6.006706 | 0.515717  | 1.244422  |
| 6 | -5.806289 | 1.504177  | -0.902686 |
| 6 | -6.869717 | 1.509061  | 1.637140  |
| 6 | -6.664130 | 2.511470  | -0.535223 |
| 6 | -7.207210 | 2.520977  | 0.745005  |
| 1 | -7.268162 | 1.480884  | 2.643279  |
| 1 | -6.898752 | 3.281586  | -1.258945 |
| 1 | -7.884861 | 3.308109  | 1.044071  |
| 6 | 1.486394  | -2.357458 | 2.254169  |
| 1 | 0.827360  | -1.595409 | 2.676431  |
| 1 | 0.848909  | -3.159925 | 1.877158  |
| 1 | 2.097159  | -2.759850 | 3.061693  |
| 6 | 2.026648  | -0.204766 | -2.303691 |
| 1 | 1.494809  | -0.982491 | -2.856323 |
| 1 | 1.310266  | 0.595179  | -2.105140 |
| 1 | 2.808363  | 0.193410  | -2.949744 |
| 9 | -2.264444 | -3.356395 | -1.591987 |
| 9 | -2.526030 | 0.812852  | 0.573702  |
| 9 | -5.265796 | 1.477990  | -2.145152 |
| 9 | -5.663869 | -0.477820 | 2.099967  |

**Table S13:** Dimer 2. Cartesian coordinates of the EE isomer in Å.

|   |           |           |           |
|---|-----------|-----------|-----------|
| 7 | 5.424711  | 0.263819  | 0.474173  |
| 7 | 6.105904  | -0.314035 | -0.390081 |
| 6 | 7.500288  | -0.152855 | -0.261862 |
| 6 | 8.307117  | -1.181427 | -0.751676 |
| 6 | 8.169869  | 0.971970  | 0.228832  |
| 6 | 9.682649  | -1.136606 | -0.733130 |
| 6 | 9.545226  | 1.063298  | 0.247445  |
| 6 | 10.298867 | -0.000862 | -0.226673 |
| 1 | 10.249675 | -1.976612 | -1.110492 |
| 1 | 10.007766 | 1.963874  | 0.628500  |
| 1 | 11.379104 | 0.058438  | -0.206447 |
| 6 | 4.029058  | 0.153450  | 0.307613  |
| 6 | 3.341974  | 0.105785  | -0.902506 |
| 6 | 3.245405  | 0.181238  | 1.459095  |
| 6 | 1.960602  | 0.062966  | -0.990374 |
| 6 | 1.865723  | 0.128404  | 1.453595  |
| 6 | 1.231723  | 0.064604  | 0.204329  |
| 6 | -0.263446 | -0.001621 | 0.156639  |
| 6 | -0.995280 | 1.180865  | 0.012743  |
| 6 | -0.889235 | -1.248768 | 0.260104  |
| 6 | -2.389153 | 1.107368  | -0.044919 |
| 6 | -2.280384 | -1.288368 | 0.222308  |
| 6 | -3.053655 | -0.127245 | 0.057283  |
| 7 | -4.440825 | -0.318317 | 0.110534  |
| 7 | -5.161291 | 0.519147  | -0.460942 |
| 6 | -6.554643 | 0.280681  | -0.307106 |
| 6 | -7.097878 | -0.507276 | 0.708631  |
| 6 | -7.383514 | 0.919493  | -1.225506 |
| 6 | -8.466488 | -0.672133 | 0.790074  |
| 6 | -8.754928 | 0.753213  | -1.158114 |
| 6 | -9.272821 | -0.042319 | -0.148648 |
| 1 | -8.912168 | -1.274481 | 1.568340  |

|   |            |           |           |
|---|------------|-----------|-----------|
| 1 | -9.414586  | 1.231548  | -1.867129 |
| 6 | 1.097963   | 0.126426  | 2.746913  |
| 1 | 0.230696   | 0.783546  | 2.685500  |
| 1 | 0.733438   | -0.877071 | 2.980891  |
| 1 | 1.723488   | 0.455043  | 3.574088  |
| 6 | 1.312908   | 0.036801  | -2.347867 |
| 1 | 0.303175   | -0.364442 | -2.292620 |
| 1 | 1.250937   | 1.044842  | -2.767037 |
| 1 | 1.891163   | -0.570195 | -3.043827 |
| 1 | -6.442623  | -0.977762 | 1.427993  |
| 1 | -6.939290  | 1.539456  | -1.993237 |
| 7 | -10.725885 | -0.217260 | -0.062319 |
| 6 | -0.129337  | -2.542209 | 0.402400  |
| 1 | -0.362248  | -3.235825 | -0.411883 |
| 1 | 0.945435   | -2.380357 | 0.382265  |
| 1 | -0.359584  | -3.045363 | 1.347370  |
| 6 | -0.344868  | 2.538027  | -0.075452 |
| 1 | -0.652635  | 3.188470  | 0.750970  |
| 1 | 0.738708   | 2.466452  | -0.027941 |
| 1 | -0.594886  | 3.045316  | -1.012450 |
| 8 | -11.168724 | -0.917750 | 0.831059  |
| 8 | -11.422791 | 0.344595  | -0.889079 |
| 8 | -2.953280  | -2.460905 | 0.312918  |
| 1 | -2.338862  | -3.186832 | 0.465677  |
| 8 | -3.131042  | 2.232715  | -0.154615 |
| 1 | -2.564424  | 3.006998  | -0.062706 |
| 9 | 7.702530   | -2.275032 | -1.244100 |
| 9 | 7.462384   | 2.029992  | 0.651499  |
| 9 | 4.038828   | 0.157923  | -2.051326 |
| 9 | 3.888888   | 0.236545  | 2.641408  |

**Table S14:** Dimer 2. Cartesian coordinates of the EZ<sub>F</sub> isomer in Å.

|   |           |           |           |
|---|-----------|-----------|-----------|
| 7 | 5.880986  | -1.579107 | 0.067769  |
| 7 | 6.760589  | -0.716014 | -0.016503 |
| 6 | 6.465557  | 0.680514  | 0.035456  |
| 6 | 6.982926  | 1.515758  | -0.947971 |
| 6 | 5.857183  | 1.299775  | 1.121159  |
| 6 | 6.866135  | 2.886093  | -0.899562 |
| 6 | 5.733352  | 2.668927  | 1.221027  |
| 6 | 6.235630  | 3.459375  | 0.197502  |
| 1 | 7.266324  | 3.484867  | -1.706491 |
| 1 | 5.254712  | 3.096306  | 2.091804  |
| 1 | 6.140556  | 4.535442  | 0.257413  |
| 6 | 4.491171  | -1.252549 | 0.061044  |
| 6 | 3.863077  | -0.595518 | -0.985237 |
| 6 | 3.673134  | -1.783734 | 1.047378  |
| 6 | 2.492110  | -0.419334 | -1.058041 |
| 6 | 2.299901  | -1.638648 | 1.056401  |
| 6 | 1.720356  | -0.943930 | -0.015443 |
| 6 | 0.233437  | -0.769554 | -0.046236 |
| 6 | -0.337921 | 0.325423  | 0.609564  |
| 6 | -0.546595 | -1.707820 | -0.730657 |
| 6 | -1.724271 | 0.490410  | 0.563000  |
| 6 | -1.926967 | -1.525710 | -0.746712 |
| 6 | -2.539522 | -0.428302 | -0.119918 |
| 7 | -3.940712 | -0.419711 | -0.153629 |
| 7 | -4.511818 | 0.681673  | -0.066477 |
| 6 | -5.931414 | 0.594059  | -0.042721 |
| 6 | -6.630844 | -0.571405 | 0.274260  |
| 6 | -6.615085 | 1.773826  | -0.323842 |
| 6 | -8.011504 | -0.559170 | 0.289256  |
| 6 | -7.998202 | 1.794353  | -0.319988 |
| 6 | -8.672835 | 0.623884  | -0.012574 |
| 1 | -8.576264 | -1.447011 | 0.534203  |



|   |            |           |           |
|---|------------|-----------|-----------|
| 1 | -8.547657  | 2.696861  | -0.544151 |
| 6 | 1.476409   | -2.207606 | 2.178626  |
| 1 | 0.983384   | -1.411445 | 2.740313  |
| 1 | 0.696124   | -2.865085 | 1.792155  |
| 1 | 2.094113   | -2.776837 | 2.869391  |
| 6 | 1.886485   | 0.292029  | -2.236769 |
| 1 | 1.521602   | -0.425750 | -2.976288 |
| 1 | 1.040786   | 0.905413  | -1.928413 |
| 1 | 2.618252   | 0.930551  | -2.727769 |
| 1 | -6.085621  | -1.473686 | 0.512417  |
| 1 | -6.049969  | 2.668649  | -0.549788 |
| 7 | -10.139022 | 0.637040  | 0.004050  |
| 6 | 0.037045   | -2.901633 | -1.441450 |
| 1 | -0.201569  | -2.891350 | -2.509785 |
| 1 | 1.120602   | -2.928235 | -1.357254 |
| 1 | -0.337142  | -3.842007 | -1.023325 |
| 6 | 0.479796   | 1.341293  | 1.366238  |
| 1 | 0.229250   | 1.352975  | 2.432886  |
| 1 | 1.543712   | 1.130243  | 1.295870  |
| 1 | 0.326357   | 2.351978  | 0.975777  |
| 8 | -2.744019  | -2.391128 | -1.395011 |
| 1 | -2.232760  | -3.119394 | -1.763749 |
| 8 | -2.316897  | 1.516514  | 1.215250  |
| 1 | -1.669240  | 1.974719  | 1.762366  |
| 8 | -10.707777 | 1.680735  | -0.264482 |
| 8 | -10.720231 | -0.396805 | 0.284044  |
| 9 | 4.280059   | -2.445328 | 2.052731  |
| 9 | 5.406460   | 0.525518  | 2.125880  |
| 9 | 7.596848   | 0.940012  | -1.995597 |
| 9 | 4.636010   | -0.141728 | -1.994701 |

**Table S15:** Dimer 2. Cartesian coordinates of the Z<sub>E</sub>F isomer in Å.

|   |            |           |           |
|---|------------|-----------|-----------|
| 7 | -4.529353  | 0.479467  | -0.478424 |
| 7 | -5.321907  | 0.289283  | 0.460447  |
| 6 | -6.647482  | 0.702696  | 0.221567  |
| 6 | -7.414804  | 1.045320  | 1.336870  |
| 6 | -7.310698  | 0.727864  | -1.009477 |
| 6 | -8.736157  | 1.422788  | 1.258955  |
| 6 | -8.637436  | 1.083186  | -1.127088 |
| 6 | -9.344854  | 1.439939  | 0.011958  |
| 1 | -9.268294  | 1.693787  | 2.160587  |
| 1 | -9.099812  | 1.072951  | -2.104999 |
| 1 | -10.384114 | 1.729067  | -0.072929 |
| 6 | -3.218097  | 0.010161  | -0.265530 |
| 6 | -2.841204  | -1.095372 | 0.493720  |
| 6 | -2.194345  | 0.660993  | -0.952605 |
| 6 | -1.532121  | -1.535478 | 0.596746  |
| 6 | -0.866221  | 0.289970  | -0.889573 |
| 6 | -0.548277  | -0.823664 | -0.098568 |
| 6 | 0.881572   | -1.260326 | -0.013506 |
| 6 | 1.719330   | -0.662580 | 0.938574  |
| 6 | 1.335216   | -2.264692 | -0.875727 |
| 6 | 3.053139   | -1.061669 | 0.995437  |
| 6 | 2.667114   | -2.649859 | -0.774940 |
| 6 | 3.552439   | -2.016407 | 0.104963  |
| 7 | 4.846911   | -2.595476 | 0.135798  |
| 7 | 5.912524   | -1.972398 | 0.243342  |
| 6 | 6.012947   | -0.554784 | 0.168052  |
| 6 | 5.484706   | 0.148356  | -0.912457 |
| 6 | 6.823794   | 0.081741  | 1.104380  |
| 6 | 5.731420   | 1.503807  | -1.031303 |
| 6 | 7.054763   | 1.438754  | 1.004875  |
| 6 | 6.500429   | 2.130083  | -0.063214 |
| 1 | 5.336242   | 2.070806  | -1.861586 |

|   |           |           |           |
|---|-----------|-----------|-----------|
| 1 | 7.663204  | 1.957757  | 1.730978  |
| 6 | 0.181890  | 1.064020  | -1.640934 |
| 1 | 0.820767  | 1.622010  | -0.952345 |
| 1 | 0.824832  | 0.392598  | -2.211004 |
| 1 | -0.272231 | 1.773773  | -2.328612 |
| 6 | -1.231557 | -2.757577 | 1.420838  |
| 1 | -1.411613 | -3.668057 | 0.842639  |
| 1 | -0.192129 | -2.767197 | 1.742049  |
| 1 | -1.869256 | -2.799997 | 2.303145  |
| 1 | 4.898507  | -0.360991 | -1.665189 |
| 1 | 7.256799  | -0.492889 | 1.912376  |
| 7 | 6.752201  | 3.567787  | -0.182252 |
| 9 | -6.820605 | 1.021715  | 2.541084  |
| 9 | -3.790323 | -1.813508 | 1.119268  |
| 9 | -2.536435 | 1.727866  | -1.700652 |
| 9 | -6.662044 | 0.345597  | -2.119100 |
| 6 | 1.237836  | 0.373924  | 1.921513  |
| 1 | 0.198669  | 0.640576  | 1.745277  |
| 1 | 1.301595  | 0.011267  | 2.952940  |
| 1 | 1.822693  | 1.296682  | 1.853935  |
| 6 | 0.464211  | -2.956447 | -1.888806 |
| 1 | -0.527202 | -2.511634 | -1.938726 |
| 1 | 0.912263  | -2.906396 | -2.883435 |
| 1 | 0.350407  | -4.016023 | -1.645771 |
| 8 | 6.263179  | 4.161597  | -1.127610 |
| 8 | 7.437229  | 4.104171  | 0.671234  |
| 8 | 3.112552  | -3.644108 | -1.579744 |
| 1 | 4.015406  | -3.874101 | -1.310418 |
| 8 | 3.907382  | -0.585394 | 1.932921  |
| 1 | 3.457245  | 0.021717  | 2.530583  |

**Table S16:** Dimer 2. Cartesian coordinates of the ZZ isomer in Å.

|   |           |           |           |
|---|-----------|-----------|-----------|
| 7 | -4.461232 | 2.409886  | 0.537882  |
| 7 | -5.621169 | 2.017308  | 0.375572  |
| 6 | -5.922103 | 0.713889  | -0.124027 |
| 6 | -6.837524 | -0.076060 | 0.561968  |
| 6 | -5.512010 | 0.252416  | -1.369471 |
| 6 | -7.290782 | -1.282415 | 0.079423  |
| 6 | -5.953022 | -0.940536 | -1.900840 |
| 6 | -6.840674 | -1.710371 | -1.163215 |
| 1 | -7.984277 | -1.866662 | 0.668907  |
| 1 | -5.604015 | -1.247475 | -2.877576 |
| 1 | -7.191071 | -2.652597 | -1.563307 |
| 6 | -3.336394 | 1.542384  | 0.398218  |
| 6 | -3.146759 | 0.402006  | 1.160187  |
| 6 | -2.268317 | 1.950801  | -0.389274 |
| 6 | -1.981125 | -0.345584 | 1.137836  |
| 6 | -1.080091 | 1.255324  | -0.479063 |
| 6 | -0.951222 | 0.094779  | 0.301380  |
| 6 | 0.326277  | -0.682352 | 0.225427  |
| 6 | 1.369440  | -0.378150 | 1.106806  |
| 6 | 0.422676  | -1.708571 | -0.723165 |
| 6 | 2.557022  | -1.101884 | 1.003167  |
| 6 | 1.611276  | -2.424932 | -0.780307 |
| 6 | 2.708475  | -2.088915 | 0.026488  |
| 7 | 3.806871  | -2.975487 | -0.107010 |
| 7 | 5.003779  | -2.655650 | -0.079136 |
| 6 | 5.466991  | -1.310363 | -0.090727 |
| 6 | 5.042048  | -0.407878 | -1.063375 |
| 6 | 6.504153  | -0.983456 | 0.779241  |
| 6 | 5.626219  | 0.843328  | -1.135850 |
| 6 | 7.075190  | 0.271916  | 0.728241  |
| 6 | 6.623145  | 1.168580  | -0.229646 |
| 1 | 5.317059  | 1.559676  | -1.883065 |

|   |           |           |           |
|---|-----------|-----------|-----------|
| 1 | 7.866651  | 0.554743  | 1.406776  |
| 6 | 0.023329  | 1.736966  | -1.380173 |
| 1 | 0.934795  | 1.924789  | -0.809964 |
| 1 | 0.261497  | 0.986627  | -2.136777 |
| 1 | -0.257636 | 2.656428  | -1.888498 |
| 6 | -1.870511 | -1.558679 | 2.019829  |
| 1 | -1.089518 | -2.229343 | 1.667870  |
| 1 | -1.627091 | -1.269711 | 3.045814  |
| 1 | -2.812586 | -2.105732 | 2.050347  |
| 1 | 4.270873  | -0.684259 | -1.769368 |
| 1 | 6.846020  | -1.715245 | 1.499134  |
| 7 | 7.234159  | 2.497696  | -0.298523 |
| 6 | -0.718755 | -2.070892 | -1.635659 |
| 1 | -1.472560 | -2.664030 | -1.109473 |
| 1 | -1.218365 | -1.181848 | -2.021635 |
| 1 | -0.366218 | -2.660365 | -2.479554 |
| 6 | 1.262461  | 0.682353  | 2.172055  |
| 1 | 0.312870  | 1.209004  | 2.116664  |
| 1 | 1.329944  | 0.252682  | 3.177096  |
| 1 | 2.052825  | 1.433164  | 2.074476  |
| 8 | 3.588198  | -0.916161 | 1.861344  |
| 1 | 3.363134  | -0.263075 | 2.533235  |
| 8 | 1.720813  | -3.453537 | -1.655864 |
| 1 | 2.558271  | -3.911088 | -1.481141 |
| 8 | 6.835162  | 3.271252  | -1.151681 |
| 8 | 8.111728  | 2.769234  | 0.502473  |
| 9 | -7.266055 | 0.361981  | 1.757962  |
| 9 | -4.679676 | 1.024841  | -2.092265 |
| 9 | -2.440829 | 3.074260  | -1.114329 |
| 9 | -4.139121 | 0.026641  | 1.994802  |

**Table S17:** Dimer 2. Cartesian coordinates of the EE to E<sub>P</sub>Z<sub>F</sub> transition state in Å.

|   |           |           |           |
|---|-----------|-----------|-----------|
| 7 | -5.508980 | 1.277198  | 0.668671  |
| 7 | -6.319185 | 0.460878  | 0.277990  |
| 6 | -7.224002 | -0.409093 | -0.136397 |
| 6 | -7.765892 | -0.371111 | -1.431293 |
| 6 | -7.707822 | -1.439599 | 0.685722  |
| 6 | -8.710734 | -1.264314 | -1.872660 |
| 6 | -8.652140 | -2.345830 | 0.270485  |
| 6 | -9.164880 | -2.264573 | -1.019725 |
| 1 | -9.081785 | -1.167662 | -2.885032 |
| 1 | -8.976629 | -3.110349 | 0.964870  |
| 1 | -9.908790 | -2.972601 | -1.356640 |
| 6 | -4.118020 | 1.003140  | 0.496755  |
| 6 | -3.539274 | -0.136300 | -0.061144 |
| 6 | -3.244041 | 1.991030  | 0.944457  |
| 6 | -2.174731 | -0.307866 | -0.185938 |
| 6 | -1.867991 | 1.888865  | 0.861591  |
| 6 | -1.348184 | 0.722753  | 0.286216  |
| 6 | 0.136493  | 0.569917  | 0.169188  |
| 6 | 0.831431  | -0.106242 | 1.175978  |
| 6 | 0.786570  | 1.107727  | -0.946579 |
| 6 | 2.214078  | -0.261141 | 1.049448  |
| 6 | 2.167905  | 0.955304  | -1.033895 |
| 6 | 2.901706  | 0.262048  | -0.058303 |
| 7 | 4.291949  | 0.250701  | -0.243654 |
| 7 | 4.926878  | -0.700250 | 0.244695  |
| 6 | 6.334581  | -0.605096 | 0.066219  |
| 6 | 7.000846  | 0.593183  | -0.193471 |
| 6 | 7.045441  | -1.794269 | 0.203123  |
| 6 | 8.374275  | 0.595833  | -0.337425 |
| 6 | 8.419973  | -1.804006 | 0.049226  |
| 6 | 9.060846  | -0.605114 | -0.218916 |
| 1 | 8.914389  | 1.510328  | -0.535310 |

|   |           |           |           |
|---|-----------|-----------|-----------|
| 1 | 8.989305  | -2.717373 | 0.140188  |
| 6 | -0.991649 | 3.004133  | 1.360619  |
| 1 | -0.107983 | 2.610259  | 1.861253  |
| 1 | -0.650221 | 3.628767  | 0.531142  |
| 1 | -1.530420 | 3.642622  | 2.057649  |
| 6 | -1.623382 | -1.569079 | -0.792065 |
| 1 | -0.764330 | -1.352511 | -1.425883 |
| 1 | -1.292395 | -2.260139 | -0.012525 |
| 1 | -2.376633 | -2.078208 | -1.389627 |
| 1 | 6.436936  | 1.511773  | -0.273451 |
| 1 | 6.507798  | -2.707312 | 0.423082  |
| 7 | 10.518898 | -0.602776 | -0.374077 |
| 6 | 0.063927  | 1.830745  | -2.053695 |
| 1 | 0.211711  | 1.335411  | -3.018617 |
| 1 | -1.008293 | 1.868051  | -1.877934 |
| 1 | 0.407190  | 2.865753  | -2.152497 |
| 6 | 0.155656  | -0.668323 | 2.400638  |
| 1 | 0.521350  | -0.193860 | 3.317994  |
| 1 | -0.919383 | -0.508825 | 2.375989  |
| 1 | 0.320327  | -1.746197 | 2.492459  |
| 8 | 11.073484 | 0.462632  | -0.579253 |
| 8 | 11.107465 | -1.666568 | -0.292324 |
| 8 | 2.865500  | 1.445630  | -2.086700 |
| 1 | 2.280828  | 1.932768  | -2.677271 |
| 8 | 2.927937  | -0.878548 | 2.018086  |
| 1 | 2.366348  | -1.044470 | 2.783599  |
| 9 | -7.309755 | 0.609797  | -2.248161 |
| 9 | -7.195331 | -1.503152 | 1.938979  |
| 9 | -4.349179 | -1.115917 | -0.497468 |
| 9 | -3.775428 | 3.099497  | 1.483733  |

**Table S18:** Dimer 2. Cartesian coordinates of the EE to Z<sub>P</sub>E<sub>F</sub> transition state in Å.

|   |            |           |           |
|---|------------|-----------|-----------|
| 7 | -5.103789  | -0.575677 | 0.465850  |
| 7 | -5.905324  | -0.133991 | -0.375131 |
| 6 | -7.224600  | -0.615185 | -0.255375 |
| 6 | -8.250110  | 0.217181  | -0.707387 |
| 6 | -7.613215  | -1.882130 | 0.190050  |
| 6 | -9.577932  | -0.144994 | -0.694103 |
| 6 | -8.930079  | -2.289426 | 0.201382  |
| 6 | -9.912010  | -1.410800 | -0.233439 |
| 1 | -10.326046 | 0.554952  | -1.040460 |
| 1 | -9.169603  | -3.286500 | 0.545852  |
| 1 | -10.949216 | -1.718750 | -0.218495 |
| 6 | -3.769602  | -0.150076 | 0.303342  |
| 6 | -3.122949  | 0.098085  | -0.902997 |
| 6 | -2.985177  | -0.057946 | 1.452415  |
| 6 | -1.781242  | 0.432894  | -0.993084 |
| 6 | -1.650407  | 0.291939  | 1.446585  |
| 6 | -1.057682  | 0.536718  | 0.198140  |
| 6 | 0.392259   | 0.909728  | 0.158483  |
| 6 | 1.349258   | -0.107877 | 0.064385  |
| 6 | 0.744320   | 2.262567  | 0.224701  |
| 6 | 2.694525   | 0.250612  | 0.037488  |
| 6 | 2.097165   | 2.592297  | 0.191820  |
| 6 | 3.088062   | 1.598493  | 0.100930  |
| 7 | 4.409257   | 2.082294  | 0.083076  |
| 7 | 5.361399   | 1.336504  | 0.012262  |
| 6 | 6.358761   | 0.511876  | -0.062086 |
| 6 | 6.962136   | -0.006498 | 1.126394  |
| 6 | 6.887290   | 0.124085  | -1.333086 |
| 6 | 8.029902   | -0.851462 | 1.032333  |
| 6 | 7.955999   | -0.722679 | -1.393758 |
| 6 | 8.542208   | -1.219563 | -0.220403 |
| 1 | 8.486873   | -1.246524 | 1.928857  |



|   |           |           |           |
|---|-----------|-----------|-----------|
| 1 | 8.357062  | -1.018807 | -2.352976 |
| 6 | -0.877304 | 0.396705  | 2.732567  |
| 1 | -0.055067 | -0.321336 | 2.751671  |
| 1 | -0.443832 | 1.391889  | 2.846064  |
| 1 | -1.516396 | 0.203120  | 3.590712  |
| 6 | -1.182959 | 0.652399  | -2.355616 |
| 1 | -0.148133 | 0.978804  | -2.286486 |
| 1 | -1.212024 | -0.268370 | -2.942524 |
| 1 | -1.745400 | 1.406115  | -2.909456 |
| 1 | 6.560214  | 0.279365  | 2.088296  |
| 1 | 6.429241  | 0.509277  | -2.233283 |
| 7 | 9.647601  | -2.101156 | -0.301130 |
| 6 | -0.268415 | 3.373281  | 0.327015  |
| 1 | -0.213272 | 4.048422  | -0.532972 |
| 1 | -1.283904 | 2.987561  | 0.362768  |
| 1 | -0.120221 | 3.969762  | 1.232925  |
| 6 | 0.992329  | -1.569714 | -0.013145 |
| 1 | 1.427226  | -2.135772 | 0.816860  |
| 1 | -0.083086 | -1.720872 | 0.028733  |
| 1 | 1.341325  | -2.019998 | -0.947898 |
| 8 | 10.150134 | -2.529977 | 0.741081  |
| 8 | 10.081250 | -2.419134 | -1.411757 |
| 8 | 2.511055  | 3.874151  | 0.246045  |
| 1 | 1.754497  | 4.468473  | 0.303524  |
| 8 | 3.669196  | -0.675527 | -0.052100 |
| 1 | 3.292940  | -1.562890 | -0.085693 |
| 9 | -7.917663 | 1.438512  | -1.156252 |
| 9 | -6.677699 | -2.763497 | 0.572637  |
| 9 | -3.801900 | -0.044042 | -2.053957 |
| 9 | -3.589790 | -0.305739 | 2.630020  |

**Table S19:** Dimer 2. Cartesian coordinates of the ZZ to E<sub>P</sub>Z<sub>F</sub> transition state in Å.

|   |           |           |           |
|---|-----------|-----------|-----------|
| 7 | -5.301767 | -2.059818 | 0.822765  |
| 7 | -6.348879 | -1.644345 | 0.316322  |
| 6 | -6.431610 | -0.369947 | -0.323049 |
| 6 | -6.984787 | -0.288278 | -1.595905 |
| 6 | -6.178370 | 0.833971  | 0.324091  |
| 6 | -7.230130 | 0.909886  | -2.226728 |
| 6 | -6.425107 | 2.057247  | -0.261145 |
| 6 | -6.945924 | 2.087423  | -1.546621 |
| 1 | -7.638420 | 0.912119  | -3.228282 |
| 1 | -6.213692 | 2.962367  | 0.292020  |
| 1 | -7.138715 | 3.039612  | -2.022783 |
| 6 | -4.057905 | -1.376269 | 0.666431  |
| 6 | -3.463491 | -1.141098 | -0.563106 |
| 6 | -3.295192 | -1.103991 | 1.792695  |
| 6 | -2.187874 | -0.622259 | -0.703899 |
| 6 | -2.021682 | -0.573082 | 1.739075  |
| 6 | -1.479934 | -0.335134 | 0.467736  |
| 6 | -0.100438 | 0.238694  | 0.366633  |
| 6 | 0.987831  | -0.640007 | 0.232025  |
| 6 | 0.052761  | 1.628291  | 0.409387  |
| 6 | 2.264988  | -0.099505 | 0.135963  |
| 6 | 1.342348  | 2.139280  | 0.310882  |
| 6 | 2.455821  | 1.291866  | 0.174591  |
| 7 | 3.668944  | 1.985820  | 0.091395  |
| 7 | 4.737634  | 1.427106  | -0.024826 |
| 6 | 5.878613  | 0.817593  | -0.144921 |
| 6 | 6.623375  | 0.443191  | 1.014466  |
| 6 | 6.413145  | 0.527397  | -1.436892 |
| 6 | 7.834023  | -0.173744 | 0.873191  |
| 6 | 7.626700  | -0.090733 | -1.545694 |
| 6 | 8.350977  | -0.445406 | -0.400187 |

|   |           |           |           |
|---|-----------|-----------|-----------|
| 1 | 8.400852  | -0.458830 | 1.748377  |
| 1 | 8.034692  | -0.312469 | -2.521912 |
| 6 | -1.267332 | -0.263741 | 3.002526  |
| 1 | -0.262463 | -0.686403 | 2.968522  |
| 1 | -1.164589 | 0.815473  | 3.137562  |
| 1 | -1.780077 | -0.665209 | 3.873644  |
| 6 | -1.609846 | -0.411104 | -2.076282 |
| 1 | -2.396905 | -0.295796 | -2.819154 |
| 1 | -0.976888 | 0.474872  | -2.100528 |
| 1 | -0.996082 | -1.265767 | -2.373700 |
| 1 | 6.216704  | 0.655169  | 1.993255  |
| 1 | 5.847337  | 0.803045  | -2.315778 |
| 7 | 9.610431  | -1.088701 | -0.529681 |
| 6 | -1.089788 | 2.596799  | 0.548737  |
| 1 | -1.129865 | 3.273531  | -0.307999 |
| 1 | -2.046486 | 2.084971  | 0.622014  |
| 1 | -0.964148 | 3.219111  | 1.437786  |
| 6 | 0.837026  | -2.139010 | 0.193038  |
| 1 | -0.202559 | -2.439243 | 0.295503  |
| 1 | 1.200178  | -2.556777 | -0.751342 |
| 1 | 1.388480  | -2.619760 | 1.007416  |
| 8 | 3.364638  | -0.867673 | 0.003575  |
| 1 | 3.127046  | -1.802152 | -0.018466 |
| 8 | 1.504873  | 3.474396  | 0.348100  |
| 1 | 2.452894  | 3.668584  | 0.268675  |
| 8 | 10.230695 | -1.397504 | 0.489418  |
| 8 | 10.049931 | -1.320663 | -1.657366 |
| 9 | -7.259969 | -1.439931 | -2.231167 |
| 9 | -5.708046 | 0.793222  | 1.584654  |
| 9 | -3.862189 | -1.352999 | 2.989426  |
| 9 | -4.160031 | -1.471992 | -1.670545 |

**Table S20:** Dimer 2. Cartesian coordinates of the ZZ to Z<sub>P</sub>E<sub>F</sub> transition state in Å.

|   |           |           |           |
|---|-----------|-----------|-----------|
| 7 | -4.405081 | -1.309361 | 1.249141  |
| 7 | -5.412821 | -1.038306 | 0.627281  |
| 6 | -6.525294 | -0.764195 | -0.031739 |
| 6 | -6.914688 | -1.475921 | -1.177944 |
| 6 | -7.398979 | 0.262521  | 0.361488  |
| 6 | -8.070555 | -1.206375 | -1.868417 |
| 6 | -8.559894 | 0.554599  | -0.311060 |
| 6 | -8.907788 | -0.182849 | -1.437727 |
| 1 | -8.303064 | -1.802522 | -2.741621 |
| 1 | -9.182039 | 1.360955  | 0.055922  |
| 1 | -9.819939 | 0.037815  | -1.973928 |
| 6 | -3.179855 | -0.672773 | 0.885471  |
| 6 | -2.969372 | 0.231629  | -0.154429 |
| 6 | -2.069023 | -1.004612 | 1.658628  |
| 6 | -1.738798 | 0.794812  | -0.430012 |
| 6 | -0.805787 | -0.488286 | 1.440808  |
| 6 | -0.659779 | 0.418065  | 0.382771  |
| 6 | 0.691817  | 1.002331  | 0.112456  |
| 6 | 1.518131  | 0.387348  | -0.837898 |
| 6 | 1.078360  | 2.157561  | 0.799989  |
| 6 | 2.777370  | 0.934720  | -1.076586 |
| 6 | 2.335267  | 2.682571  | 0.522455  |
| 6 | 3.218280  | 2.052420  | -0.362331 |
| 7 | 4.413012  | 2.780689  | -0.596486 |
| 7 | 5.540888  | 2.289881  | -0.744580 |
| 6 | 5.845429  | 0.918390  | -0.517776 |
| 6 | 5.515521  | 0.295879  | 0.684067  |
| 6 | 6.653825  | 0.277828  | -1.453472 |
| 6 | 5.959307  | -0.990239 | 0.931180  |
| 6 | 7.079535  | -1.014811 | -1.224237 |
| 6 | 6.721816  | -1.630280 | -0.032893 |

|   |           |           |           |
|---|-----------|-----------|-----------|
| 1 | 5.720862  | -1.493264 | 1.856996  |
| 1 | 7.689695  | -1.539421 | -1.944837 |
| 6 | 0.347217  | -0.886151 | 2.320086  |
| 1 | 1.219731  | -1.146621 | 1.720576  |
| 1 | 0.634499  | -0.061506 | 2.976673  |
| 1 | 0.088967  | -1.738655 | 2.944195  |
| 6 | -1.588857 | 1.758634  | -1.574766 |
| 1 | -0.901884 | 2.563548  | -1.317033 |
| 1 | -1.188921 | 1.252403  | -2.457214 |
| 1 | -2.547768 | 2.194060  | -1.848184 |
| 1 | 4.930021  | 0.816854  | 1.429197  |
| 1 | 6.931564  | 0.796311  | -2.361548 |
| 7 | 7.182922  | -2.996459 | 0.223922  |
| 6 | 0.206903  | 2.872051  | 1.796704  |
| 1 | -0.000315 | 3.893027  | 1.467442  |
| 1 | -0.743933 | 2.363696  | 1.941157  |
| 1 | 0.704852  | 2.947320  | 2.766117  |
| 6 | 1.104589  | -0.831400 | -1.622642 |
| 1 | 0.142211  | -1.214715 | -1.292175 |
| 1 | 1.011537  | -0.612536 | -2.691593 |
| 1 | 1.827082  | -1.645467 | -1.509168 |
| 8 | 3.605057  | 0.443948  | -2.029642 |
| 1 | 3.182485  | -0.272702 | -2.515947 |
| 8 | 2.710917  | 3.819760  | 1.153944  |
| 1 | 3.547415  | 4.122335  | 0.767192  |
| 8 | 6.876504  | -3.518128 | 1.281936  |
| 8 | 7.849621  | -3.548905 | -0.633746 |
| 9 | -6.084937 | -2.468205 | -1.583510 |
| 9 | -7.042168 | 0.970906  | 1.460711  |
| 9 | -2.247386 | -1.872869 | 2.667078  |
| 9 | -4.014449 | 0.570143  | -0.928741 |

**Table S21:** Dimer 1. Approximate Cartesian coordinates of the EE  $\leftrightarrow$  EZ<sub>F</sub> conical intersection in Å.

|   |           |           |           |
|---|-----------|-----------|-----------|
| 7 | 5.430856  | 0.622686  | -0.140490 |
| 7 | 6.180357  | -0.363953 | -0.185896 |
| 6 | 7.563837  | -0.078742 | -0.349428 |
| 6 | 8.404315  | -1.187442 | -0.367042 |
| 6 | 8.092909  | 1.205690  | -0.489553 |
| 6 | 9.773638  | -1.019911 | -0.521648 |
| 1 | 7.969655  | -2.173539 | -0.257872 |
| 6 | 9.458847  | 1.365649  | -0.644928 |
| 1 | 7.430303  | 2.060103  | -0.476101 |
| 6 | 10.301913 | 0.256197  | -0.661001 |
| 1 | 10.425881 | -1.884381 | -0.534075 |
| 1 | 9.873854  | 2.360280  | -0.754879 |
| 1 | 11.369865 | 0.390970  | -0.782818 |
| 6 | 4.046981  | 0.334937  | 0.014865  |
| 6 | 3.514812  | -0.948845 | 0.096327  |
| 6 | 3.211954  | 1.440636  | 0.084700  |
| 6 | 2.148863  | -1.132018 | 0.247936  |
| 1 | 4.175851  | -1.803064 | 0.039460  |
| 6 | 1.837521  | 1.289658  | 0.237295  |
| 1 | 3.650391  | 2.429352  | 0.019339  |
| 6 | 1.310588  | -0.004912 | 0.318186  |
| 6 | -0.160826 | -0.192752 | 0.480688  |
| 6 | -0.987270 | -0.290778 | -0.637571 |
| 6 | -0.725286 | -0.271317 | 1.754570  |
| 6 | -2.339599 | -0.467725 | -0.472848 |
| 1 | -0.584880 | -0.228642 | -1.640497 |
| 6 | -2.078891 | -0.448376 | 1.884295  |
| 1 | -0.114185 | -0.197111 | 2.644888  |
| 6 | -2.953875 | -0.560822 | 0.789831  |
| 7 | -4.283915 | -0.730429 | 1.015593  |

|   |           |           |           |
|---|-----------|-----------|-----------|
| 7 | -5.192993 | -0.977363 | 0.179052  |
| 6 | -6.214296 | -0.182052 | -0.236956 |
| 6 | -6.372058 | 1.180435  | 0.081371  |
| 6 | -7.208194 | -0.722165 | -1.072884 |
| 6 | -7.423102 | 1.938396  | -0.377127 |
| 6 | -8.269545 | 0.005019  | -1.549445 |
| 6 | -8.377477 | 1.345899  | -1.195209 |
| 1 | -7.485077 | 2.980661  | -0.093759 |
| 1 | -8.999511 | -0.474926 | -2.187587 |
| 1 | -9.210367 | 1.931577  | -1.560772 |
| 6 | 0.951042  | 2.504880  | 0.312312  |
| 1 | 0.221995  | 2.516694  | -0.500870 |
| 1 | 0.387897  | 2.529738  | 1.247653  |
| 1 | 1.543197  | 3.417419  | 0.248907  |
| 6 | 1.583408  | -2.525545 | 0.334752  |
| 1 | 1.067953  | -2.687107 | 1.284080  |
| 1 | 0.856454  | -2.710076 | -0.459117 |
| 1 | 2.375924  | -3.268428 | 0.248852  |
| 9 | -2.617753 | -0.527883 | 3.110925  |
| 9 | -3.125979 | -0.545653 | -1.559524 |
| 9 | -7.089693 | -2.018255 | -1.403929 |
| 9 | -5.437308 | 1.752897  | 0.860132  |

**Table S22:** Dimer 1. Approximate Cartesian coordinates of the ZZ $\leftrightarrow$ EZ<sub>F</sub> conical intersection in Å.

|   |           |           |           |
|---|-----------|-----------|-----------|
| 7 | 5.247730  | -1.487484 | -0.197837 |
| 7 | 6.001935  | -0.646591 | -0.713684 |
| 6 | 6.355354  | 0.581810  | -0.196242 |
| 6 | 6.884303  | 1.543397  | -1.066928 |
| 6 | 6.184914  | 0.889554  | 1.163754  |
| 6 | 7.205053  | 2.800297  | -0.587358 |
| 1 | 7.016309  | 1.289675  | -2.111222 |
| 6 | 6.496647  | 2.158288  | 1.622909  |
| 1 | 5.793990  | 0.132898  | 1.832650  |
| 6 | 7.013030  | 3.115315  | 0.755457  |
| 1 | 7.600174  | 3.545879  | -1.266809 |
| 1 | 6.352392  | 2.398241  | 2.669708  |
| 1 | 7.265368  | 4.102290  | 1.122736  |
| 6 | 3.868982  | -1.466625 | -0.180087 |
| 6 | 3.132075  | -0.659836 | -1.056214 |
| 6 | 3.202472  | -2.268159 | 0.749691  |
| 6 | 1.747764  | -0.614858 | -0.977249 |
| 1 | 3.658037  | -0.056122 | -1.785848 |
| 6 | 1.819544  | -2.245842 | 0.836933  |
| 1 | 3.785642  | -2.893775 | 1.414130  |
| 6 | 1.090806  | -1.415530 | -0.030600 |
| 6 | -0.399335 | -1.386303 | 0.052831  |
| 6 | -1.038786 | -0.559720 | 0.972153  |
| 6 | -1.164486 | -2.192548 | -0.788370 |
| 6 | -2.415439 | -0.539046 | 1.022405  |
| 1 | -0.478070 | 0.068768  | 1.651750  |
| 6 | -2.535599 | -2.154403 | -0.692808 |
| 1 | -0.701922 | -2.850134 | -1.512707 |
| 6 | -3.209948 | -1.316773 | 0.187445  |
| 7 | -4.624836 | -1.449181 | 0.318899  |



|   |           |           |           |
|---|-----------|-----------|-----------|
| 7 | -5.400366 | -0.486123 | 0.305601  |
| 6 | -4.989590 | 0.847771  | 0.004468  |
| 6 | -4.360839 | 1.220050  | -1.179512 |
| 6 | -5.406745 | 1.880215  | 0.837355  |
| 6 | -4.127431 | 2.536716  | -1.513808 |
| 6 | -5.178879 | 3.206922  | 0.553182  |
| 6 | -4.534983 | 3.529275  | -0.634707 |
| 1 | -3.638562 | 2.767746  | -2.450625 |
| 1 | -5.505027 | 3.966107  | 1.251036  |
| 1 | -4.353151 | 4.567349  | -0.879499 |
| 6 | 1.123850  | -3.100993 | 1.864007  |
| 1 | 0.616193  | -2.487811 | 2.612038  |
| 1 | 0.365864  | -3.738254 | 1.404246  |
| 1 | 1.838719  | -3.740192 | 2.381296  |
| 6 | 0.976158  | 0.273596  | -1.918099 |
| 1 | 0.331771  | -0.311358 | -2.578112 |
| 1 | 0.331792  | 0.965886  | -1.372183 |
| 1 | 1.654505  | 0.857787  | -2.539146 |
| 9 | -3.272894 | -2.937054 | -1.497925 |
| 9 | -3.019449 | 0.240628  | 1.937973  |
| 9 | -6.034828 | 1.545895  | 1.976982  |
| 9 | -3.999342 | 0.253335  | -2.043467 |

**Table S23:** Dimer 1. Approximate Cartesian coordinates of the ZZ $\leftrightarrow$  ZE<sub>F</sub>

conical intersection in Å.

|   |           |           |           |
|---|-----------|-----------|-----------|
| 7 | -5.905111 | -1.610841 | -0.584647 |
| 7 | -6.770241 | -0.729567 | -0.537660 |
| 6 | -6.463524 | 0.666385  | -0.393197 |
| 6 | -7.156425 | 1.367752  | 0.587048  |
| 6 | -5.639175 | 1.336407  | -1.292158 |
| 6 | -6.966747 | 2.735664  | 0.715610  |
| 1 | -7.828187 | 0.834162  | 1.248605  |
| 6 | -5.481695 | 2.710003  | -1.176847 |
| 1 | -5.134489 | 0.791808  | -2.079470 |
| 6 | -6.131018 | 3.410028  | -0.166815 |
| 1 | -7.486270 | 3.278567  | 1.495723  |
| 1 | -4.846775 | 3.235248  | -1.879955 |
| 1 | -5.997261 | 4.481021  | -0.076797 |
| 6 | -4.511751 | -1.354826 | -0.348263 |
| 6 | -4.067728 | -0.778005 | 0.832733  |
| 6 | -3.605962 | -1.855017 | -1.271039 |
| 6 | -2.705517 | -0.656440 | 1.082826  |
| 1 | -4.781289 | -0.426978 | 1.567433  |
| 6 | -2.238828 | -1.720768 | -1.059794 |
| 1 | -3.973744 | -2.340684 | -2.167309 |
| 6 | -1.792258 | -1.117296 | 0.124415  |
| 6 | -0.327528 | -0.974759 | 0.374207  |
| 6 | 0.345191  | 0.177627  | -0.027040 |
| 6 | 0.385238  | -1.993078 | 1.008029  |
| 6 | 1.694273  | 0.298652  | 0.207993  |
| 1 | -0.172685 | 0.983258  | -0.531270 |
| 6 | 1.730385  | -1.838770 | 1.230764  |
| 1 | -0.102230 | -2.903881 | 1.330763  |
| 6 | 2.445077  | -0.692935 | 0.856119  |
| 7 | 3.779551  | -0.611836 | 1.147929  |

|   |           |           |           |
|---|-----------|-----------|-----------|
| 7 | 4.516459  | 0.402135  | 1.037524  |
| 6 | 5.523009  | 0.591814  | 0.128909  |
| 6 | 5.783645  | -0.231950 | -0.978089 |
| 6 | 6.393223  | 1.678622  | 0.297042  |
| 6 | 6.831616  | -0.007129 | -1.840357 |
| 6 | 7.450386  | 1.931203  | -0.541372 |
| 6 | 7.668609  | 1.078959  | -1.618147 |
| 1 | 6.978756  | -0.677200 | -2.676805 |
| 1 | 8.087565  | 2.784385  | -0.351548 |
| 1 | 8.494826  | 1.266126  | -2.290751 |
| 6 | -1.268414 | -2.231647 | -2.091961 |
| 1 | -0.616974 | -1.432828 | -2.452929 |
| 1 | -0.622326 | -3.009910 | -1.680064 |
| 1 | -1.799165 | -2.649319 | -2.947019 |
| 6 | -2.236921 | -0.034369 | 2.371977  |
| 1 | -1.592606 | -0.716257 | 2.930905  |
| 1 | -1.658224 | 0.873361  | 2.186839  |
| 1 | -3.084296 | 0.228105  | 3.004718  |
| 9 | 2.414505  | -2.817169 | 1.846172  |
| 9 | 2.336007  | 1.400043  | -0.218845 |
| 9 | 6.168252  | 2.489652  | 1.344059  |
| 9 | 4.953216  | -1.264191 | -1.210125 |

**Table S24:** Dimer 2. Approximate Cartesian coordinates of the EE  $\leftrightarrow$  Z<sub>P</sub>E<sub>F</sub> conical intersection in Å.

|   |            |           |           |
|---|------------|-----------|-----------|
| 7 | -5.111378  | -0.715097 | 0.306024  |
| 7 | -5.979925  | 0.084198  | -0.083836 |
| 6 | -7.297871  | -0.417968 | -0.089387 |
| 6 | -8.331550  | 0.506295  | 0.070390  |
| 6 | -7.688382  | -1.740501 | -0.323549 |
| 6 | -9.664139  | 0.162650  | 0.041174  |
| 6 | -9.012112  | -2.121427 | -0.378543 |
| 6 | -9.998415  | -1.165059 | -0.185041 |
| 1 | -10.415857 | 0.925521  | 0.191335  |
| 1 | -9.254096  | -3.157360 | -0.574566 |
| 1 | -11.039822 | -1.457223 | -0.217115 |
| 6 | -3.781254  | -0.258583 | 0.213220  |
| 6 | -3.262825  | 0.601607  | -0.751395 |
| 6 | -2.864230  | -0.793541 | 1.115809  |
| 6 | -1.921918  | 0.939818  | -0.825726 |
| 6 | -1.516130  | -0.495883 | 1.113299  |
| 6 | -1.055167  | 0.384903  | 0.122882  |
| 6 | 0.402034   | 0.725520  | 0.078772  |
| 6 | 1.250514   | -0.018561 | -0.751992 |
| 6 | 0.883364   | 1.777814  | 0.871745  |
| 6 | 2.604448   | 0.302091  | -0.782020 |
| 6 | 2.238001   | 2.079222  | 0.816936  |
| 6 | 3.123693   | 1.364743  | -0.014695 |
| 7 | 4.435863   | 1.738625  | -0.028965 |
| 7 | 5.358667   | 1.445138  | -0.842932 |
| 6 | 6.410640   | 0.612028  | -0.520563 |
| 6 | 6.529572   | -0.014485 | 0.733815  |
| 6 | 7.404106   | 0.411780  | -1.494777 |
| 6 | 7.611285   | -0.821086 | 1.000695  |
| 6 | 8.481737   | -0.400006 | -1.231545 |

|   |           |           |           |
|---|-----------|-----------|-----------|
| 6 | 8.579933  | -1.008354 | 0.018149  |
| 1 | 7.718282  | -1.306823 | 1.959912  |
| 1 | 9.248772  | -0.567221 | -1.973719 |
| 6 | -0.601533 | -1.101763 | 2.141957  |
| 1 | 0.329515  | -1.437055 | 1.685408  |
| 1 | -0.344681 | -0.370978 | 2.912923  |
| 1 | -1.072380 | -1.951180 | 2.632165  |
| 6 | -1.458213 | 1.862130  | -1.919810 |
| 1 | -0.512105 | 2.332422  | -1.659906 |
| 1 | -1.315071 | 1.313958  | -2.855059 |
| 1 | -2.194339 | 2.642651  | -2.109980 |
| 1 | 5.769249  | 0.158003  | 1.484676  |
| 1 | 7.302813  | 0.902758  | -2.454170 |
| 7 | 9.716830  | -1.855476 | 0.302210  |
| 6 | -0.004936 | 2.609358  | 1.761640  |
| 1 | 0.020804  | 3.666976  | 1.479033  |
| 1 | -1.043007 | 2.292676  | 1.700857  |
| 1 | 0.294054  | 2.536033  | 2.812277  |
| 6 | 0.770936  | -1.169309 | -1.599030 |
| 1 | 1.268455  | -2.104961 | -1.323215 |
| 1 | -0.297329 | -1.333400 | -1.485630 |
| 1 | 0.957329  | -0.991102 | -2.662935 |
| 8 | 9.794876  | -2.370238 | 1.408743  |
| 8 | 10.555135 | -2.011738 | -0.574102 |
| 8 | 2.791736  | 3.079951  | 1.541245  |
| 1 | 2.124162  | 3.524564  | 2.074805  |
| 8 | 3.495721  | -0.382722 | -1.535331 |
| 1 | 3.052906  | -1.061525 | -2.057162 |
| 9 | -7.999998 | 1.790350  | 0.282773  |
| 9 | -6.755896 | -2.675949 | -0.556042 |
| 9 | -4.083061 | 1.094048  | -1.696040 |
| 9 | -3.341860 | -1.635233 | 2.053049  |

**Table S25:** Dimer 2. Approximate Cartesian coordinates of the  $ZZ \rightleftharpoons E_F Z_F$  conical intersection in Å.

|   |           |           |           |
|---|-----------|-----------|-----------|
| 7 | 5.015365  | -1.885821 | 1.306176  |
| 7 | 6.104065  | -1.570102 | 0.814385  |
| 6 | 6.217323  | -0.641187 | -0.264129 |
| 6 | 7.131394  | 0.401318  | -0.161299 |
| 6 | 5.616754  | -0.821283 | -1.505213 |
| 6 | 7.405749  | 1.258579  | -1.202144 |
| 6 | 5.874646  | 0.001024  | -2.581005 |
| 6 | 6.768341  | 1.049537  | -2.418618 |
| 1 | 8.107348  | 2.068653  | -1.055992 |
| 1 | 5.381871  | -0.190126 | -3.524721 |
| 1 | 6.975878  | 1.708726  | -3.251081 |
| 6 | 3.799846  | -1.219169 | 0.967074  |
| 6 | 3.591225  | 0.137103  | 1.152693  |
| 6 | 2.688965  | -1.979086 | 0.626839  |
| 6 | 2.361806  | 0.751079  | 0.981388  |
| 6 | 1.434877  | -1.442558 | 0.419030  |
| 6 | 1.285549  | -0.057879 | 0.603732  |
| 6 | -0.062392 | 0.556635  | 0.388009  |
| 6 | -0.990294 | 0.565434  | 1.436962  |
| 6 | -0.343565 | 1.115709  | -0.866500 |
| 6 | -2.228581 | 1.157685  | 1.214254  |
| 6 | -1.586125 | 1.700556  | -1.062111 |
| 6 | -2.555139 | 1.701667  | -0.042816 |
| 7 | -3.751343 | 2.302025  | -0.295933 |
| 7 | -4.901478 | 2.229195  | 0.197842  |
| 6 | -5.786986 | 1.183057  | -0.043851 |
| 6 | -5.651679 | 0.283457  | -1.113821 |
| 6 | -6.878507 | 1.056408  | 0.832588  |
| 6 | -6.574008 | -0.726219 | -1.287312 |
| 6 | -7.797103 | 0.045887  | 0.663368  |
| 6 | -7.632932 | -0.840243 | -0.396309 |

|   |           |           |           |
|---|-----------|-----------|-----------|
| 1 | -6.484863 | -1.421768 | -2.109327 |
| 1 | -8.634346 | -0.066635 | 1.336873  |
| 6 | 0.286297  | -2.321290 | 0.006342  |
| 1 | -0.533804 | -2.255708 | 0.723049  |
| 1 | -0.105220 | -2.013431 | -0.965535 |
| 1 | 0.594327  | -3.361882 | -0.064809 |
| 6 | 2.240989  | 2.227855  | 1.240128  |
| 1 | 1.346944  | 2.637331  | 0.775325  |
| 1 | 2.181355  | 2.426164  | 2.313596  |
| 1 | 3.109875  | 2.763320  | 0.857725  |
| 1 | -4.829606 | 0.380827  | -1.807581 |
| 1 | -6.977189 | 1.760986  | 1.647608  |
| 7 | -8.603047 | -1.907605 | -0.585172 |
| 6 | 0.666596  | 1.120294  | -1.983524 |
| 1 | 1.421394  | 1.896947  | -1.829905 |
| 1 | 1.190257  | 0.166141  | -2.048213 |
| 1 | 0.185112  | 1.312989  | -2.940083 |
| 6 | -0.704089 | -0.011448 | 2.798920  |
| 1 | 0.279834  | -0.472130 | 2.840357  |
| 1 | -0.729691 | 0.760359  | 3.574631  |
| 1 | -1.433244 | -0.781842 | 3.069512  |
| 8 | -3.187854 | 1.238492  | 2.166232  |
| 1 | -2.884482 | 0.843453  | 2.991325  |
| 8 | -1.868396 | 2.270769  | -2.258905 |
| 1 | -2.740578 | 2.684400  | -2.221008 |
| 8 | -8.465763 | -2.653923 | -1.542153 |
| 8 | -9.516529 | -2.009155 | 0.218953  |
| 9 | 7.742956  | 0.579583  | 1.021899  |
| 9 | 4.780788  | -1.864080 | -1.664570 |
| 9 | 2.883123  | -3.303907 | 0.468662  |
| 9 | 4.634074  | 0.887559  | 1.567130  |
